# Supplementary material for: Whole Genome Screening Procures a Holistic Hold of the Russian Chicken Gene Pool Heritage and Demographic History
Source: MDPI journal article supplement (doi:10.3390/biology12070979), 2023-07-10

**Supplementary Figure S9. ADMIXTURE-derived structure of the studied populations with K = 2 to 26 ancestral populations.**

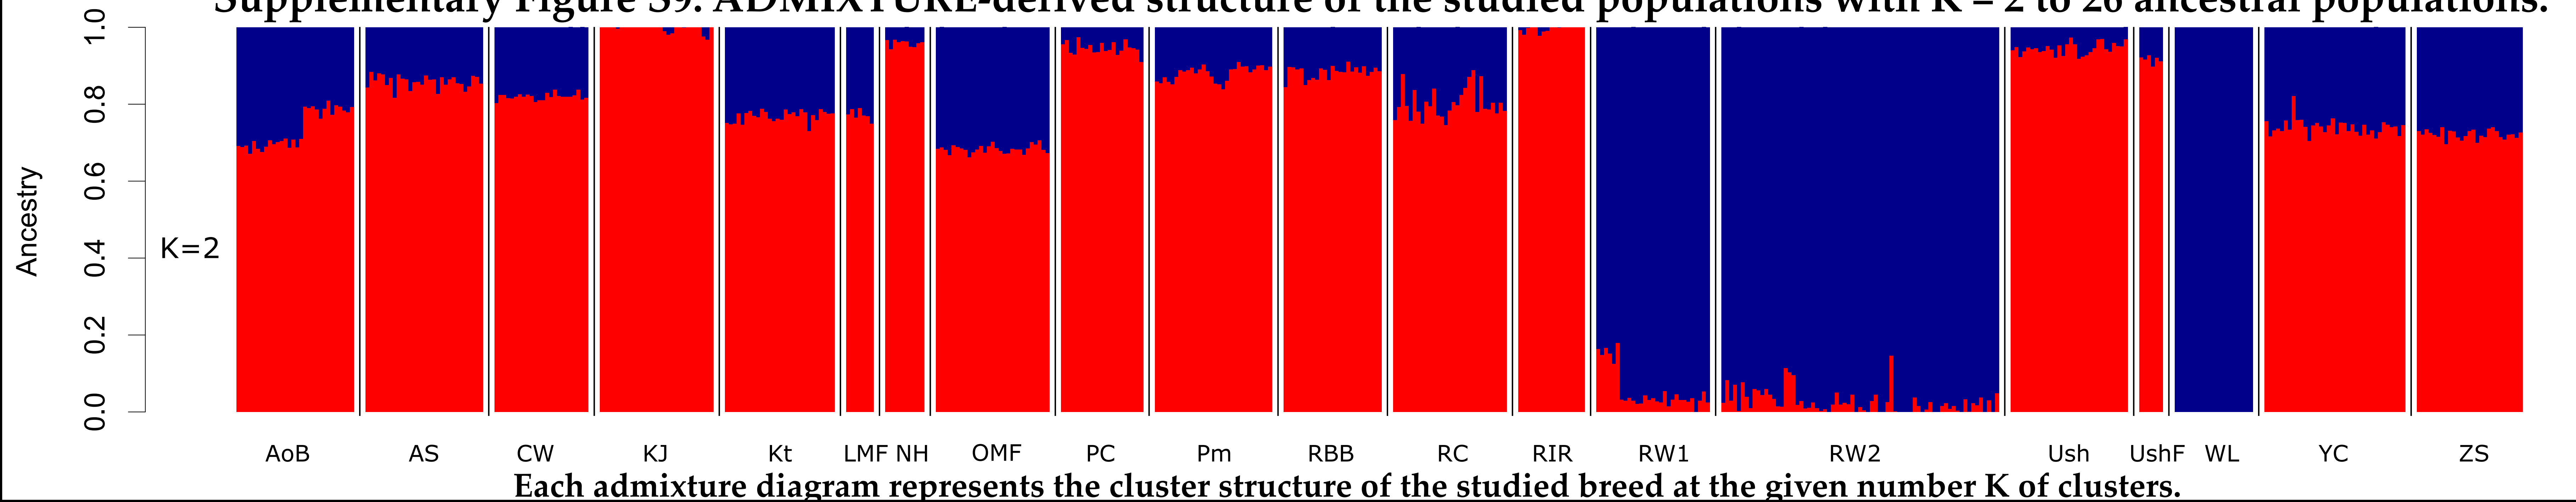

Ancestry

1.0  
0.8  
0.6  
0.4  
0.2  
0.0

$K=3$

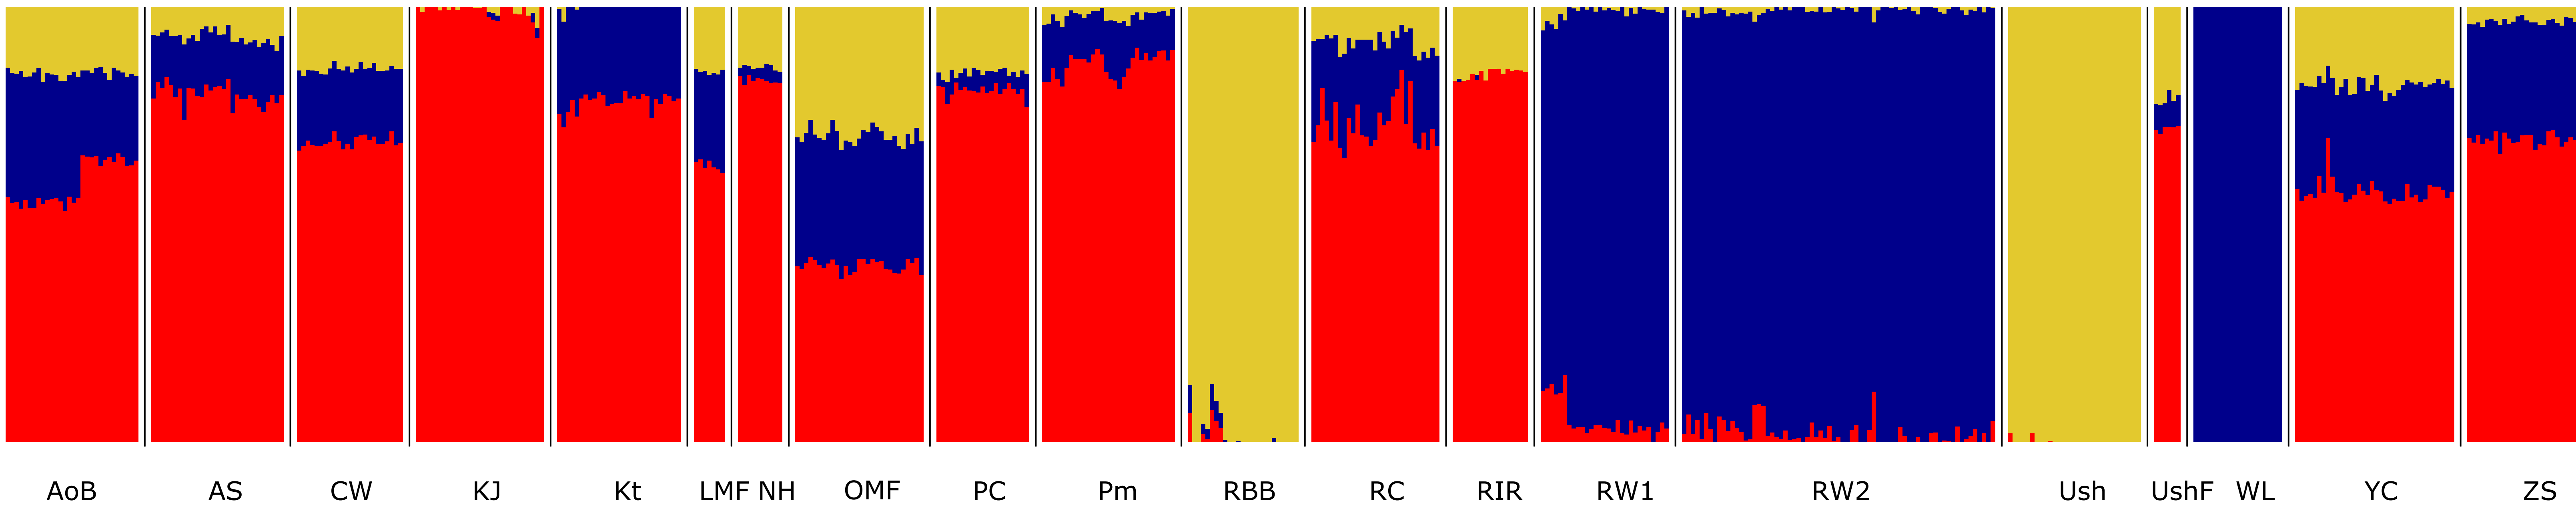

Ancestry

K=4

1.0  
0.8  
0.6  
0.4  
0.2  
0.0

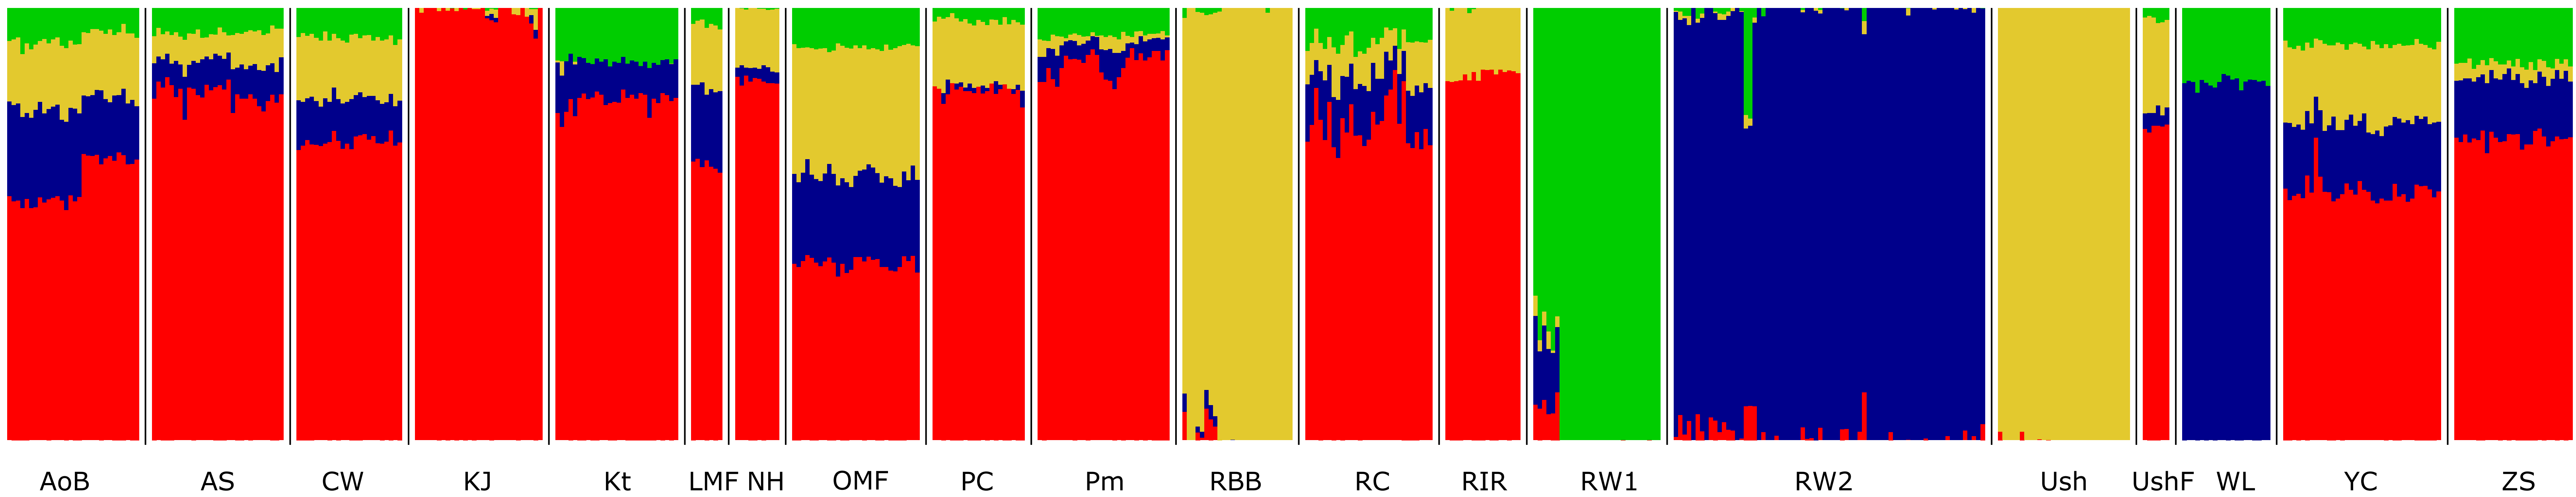

Ancestry

$K=5$

1.0  
0.8  
0.6  
0.4  
0.2  
0.0

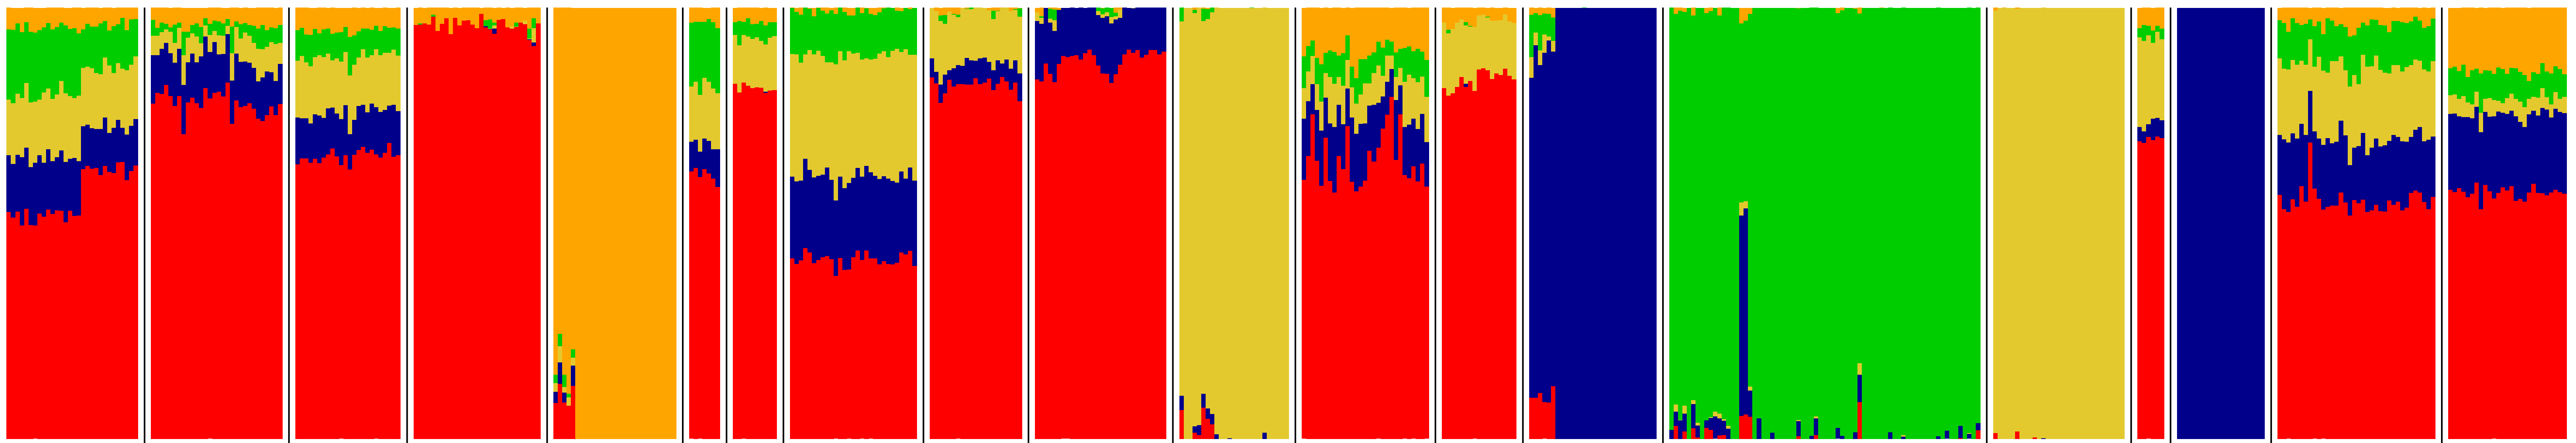

AoB

AS

CW

KJ

Kt

LMF

NH

OMF

PC

Pm

RBB

RC

RIR

RW1

RW2

Ush

UshF

WL

YC

ZS

Ancestry

1.0  
0.8  
0.6  
0.4  
0.2  
0.0

K=6

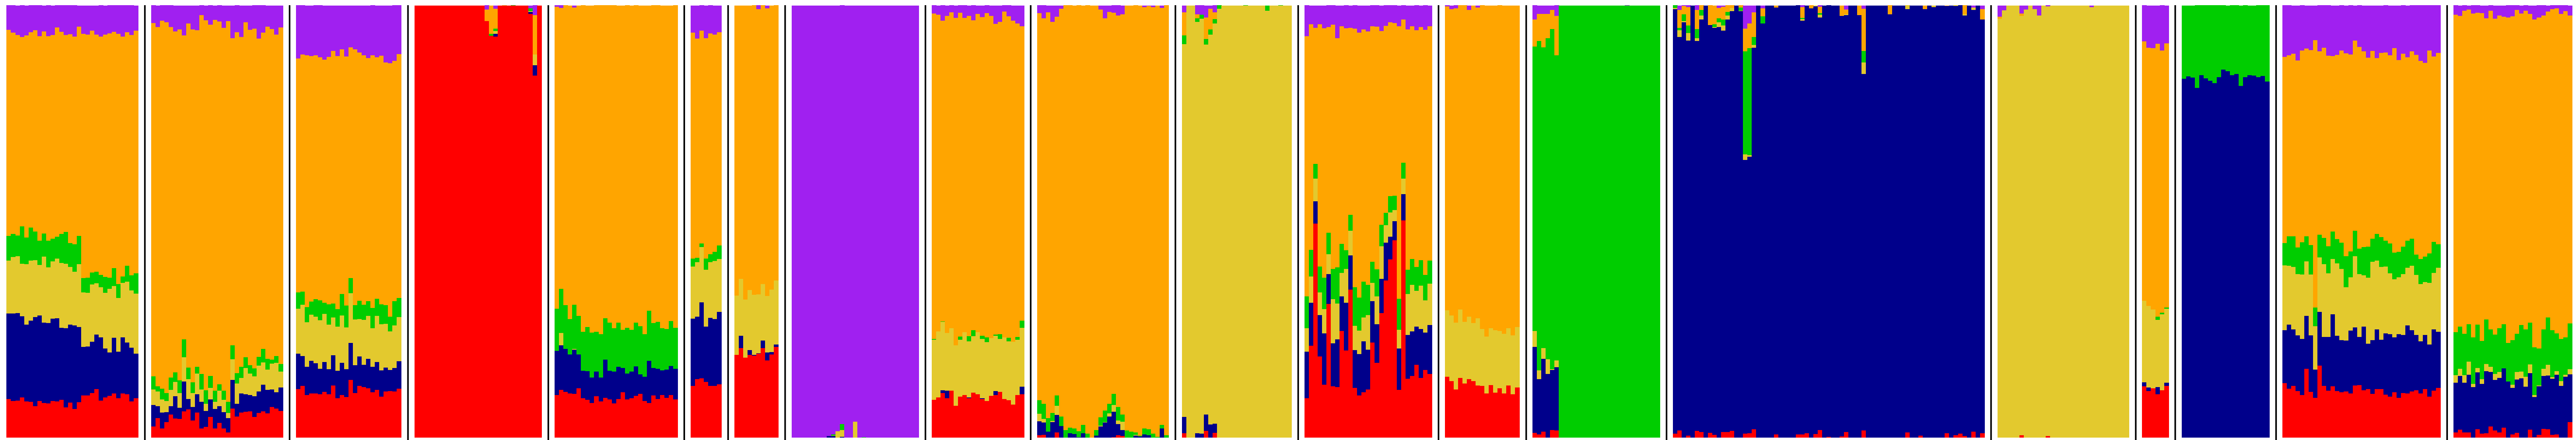

AoB

AS

CW

KJ

Kt

LMF NH

OMF

PC

Pm

RBB

RC

RIR

RW1

RW2

Ush

UshF

WL

YC

ZS

Ancestry

1.0  
0.8  
0.6  
0.4  
0.2  
0.0

K=7

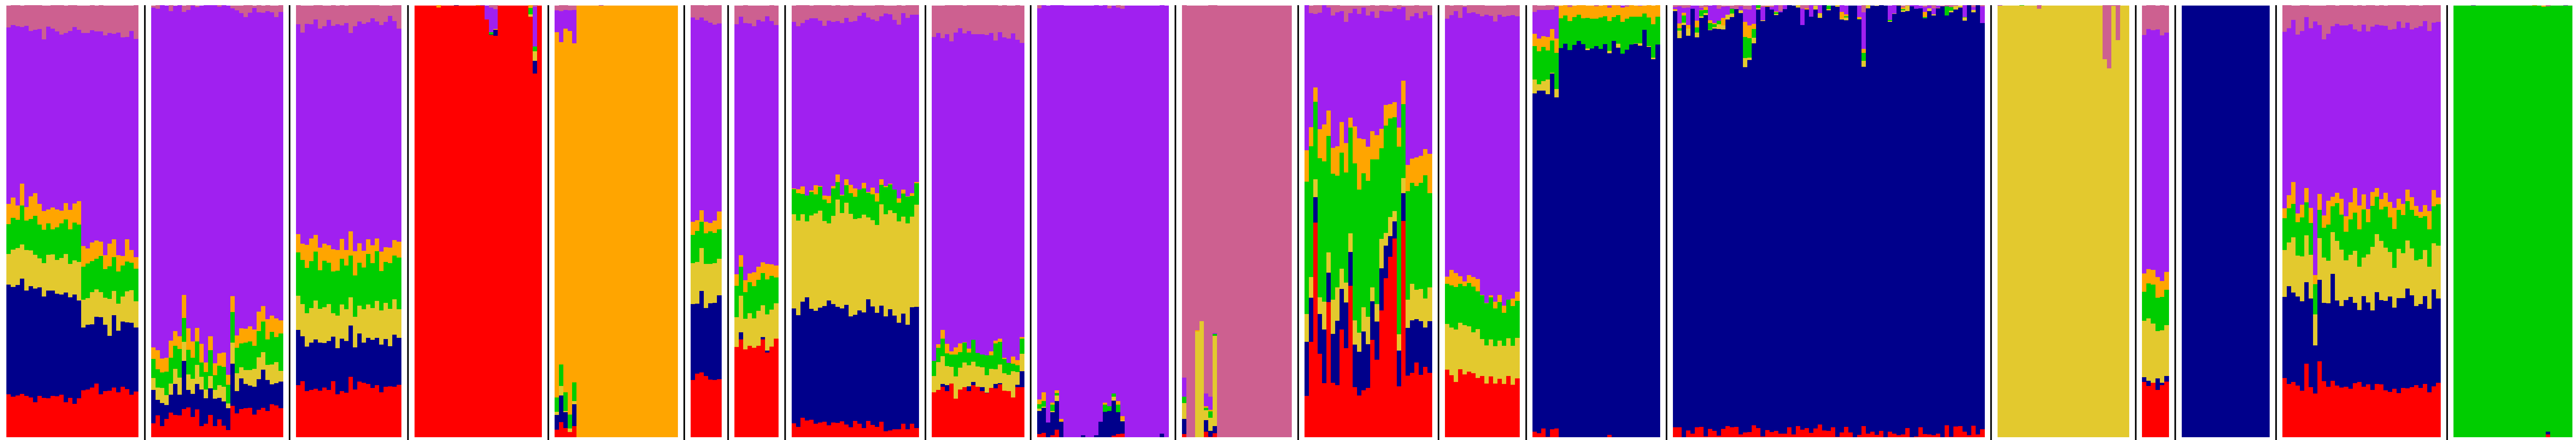

AoB

AS

CW

KJ

Kt

LMF NH

OMF

PC

Pm

RBB

RC

RIR

RW1

RW2

Ush

UshF

WL

YC

ZS

Ancestry

1.0  
0.8  
0.6  
0.4  
0.2  
0.0

$K=8$

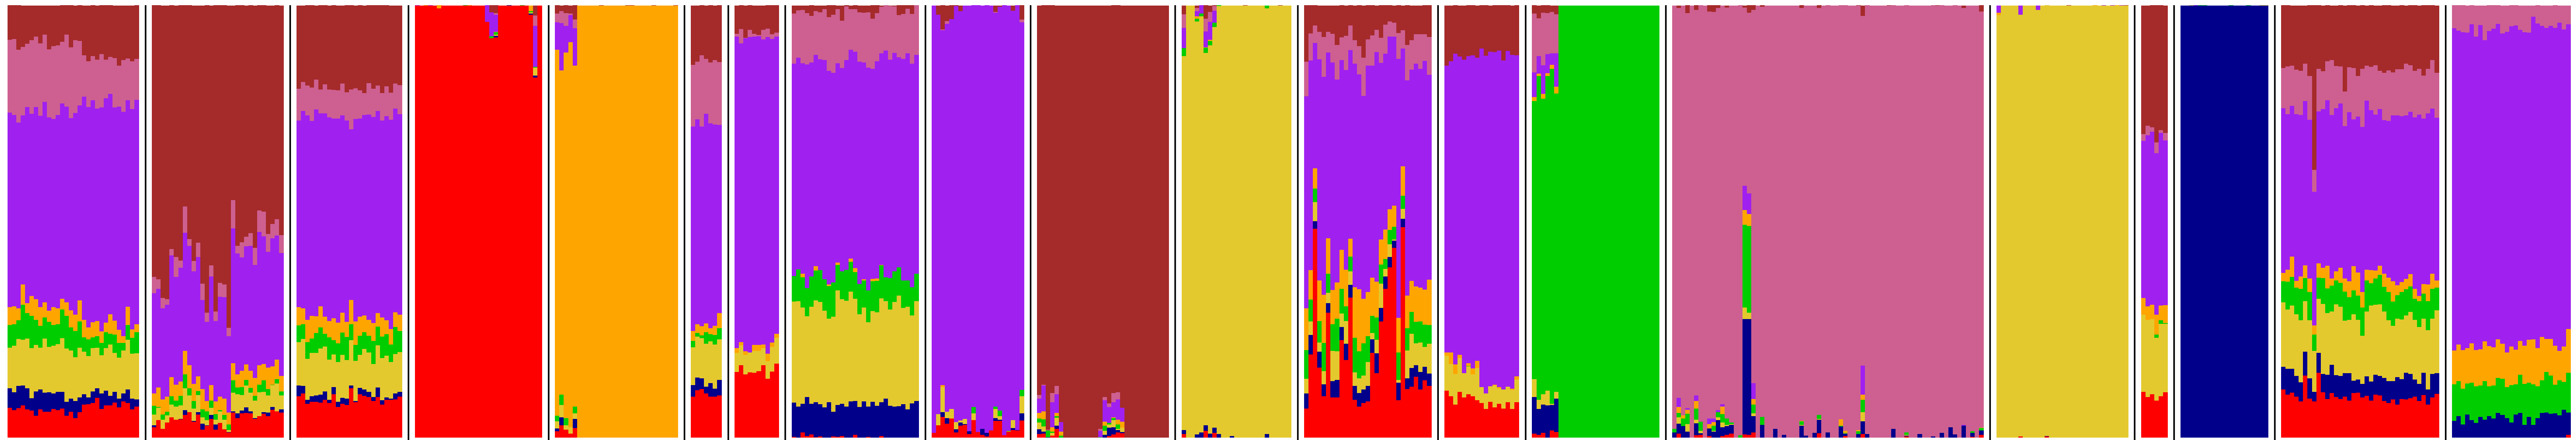

AoB

AS

CW

KJ

Kt

LMF NH

OMF

PC

Pm

RBB

RC

RIR

RW1

RW2

Ush

UshF

WL

YC

ZS

Ancestry

1.0  
0.8  
0.6  
0.4  
0.2  
0.0

$K=9$

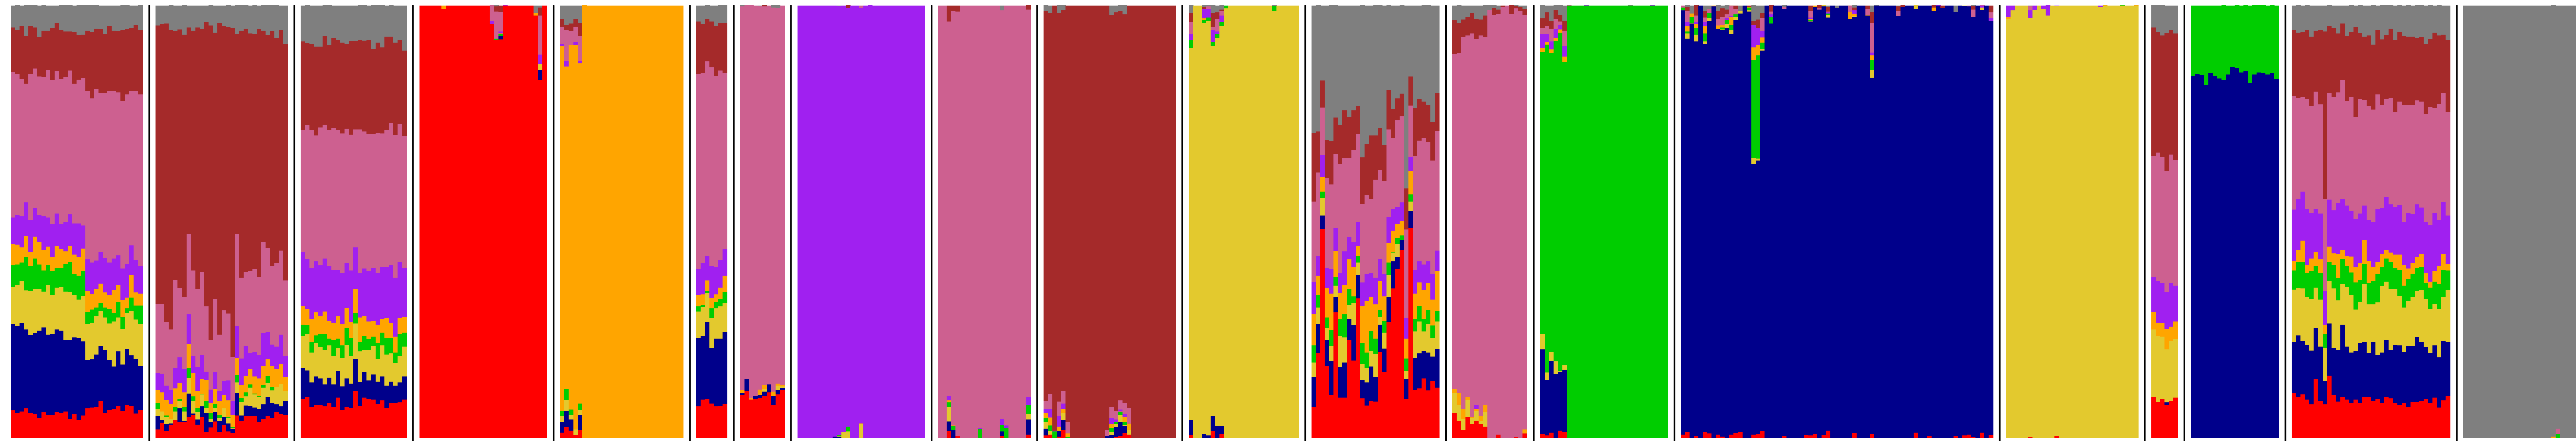

AoB

AS

CW

KJ

Kt

LMF NH

OMF

PC

Pm

RBB

RC

RIR

RW1

RW2

Ush

UshF

WL

YC

ZS



Ancestry

1.0  
0.8  
0.6  
0.4  
0.2  
0.0

K=10

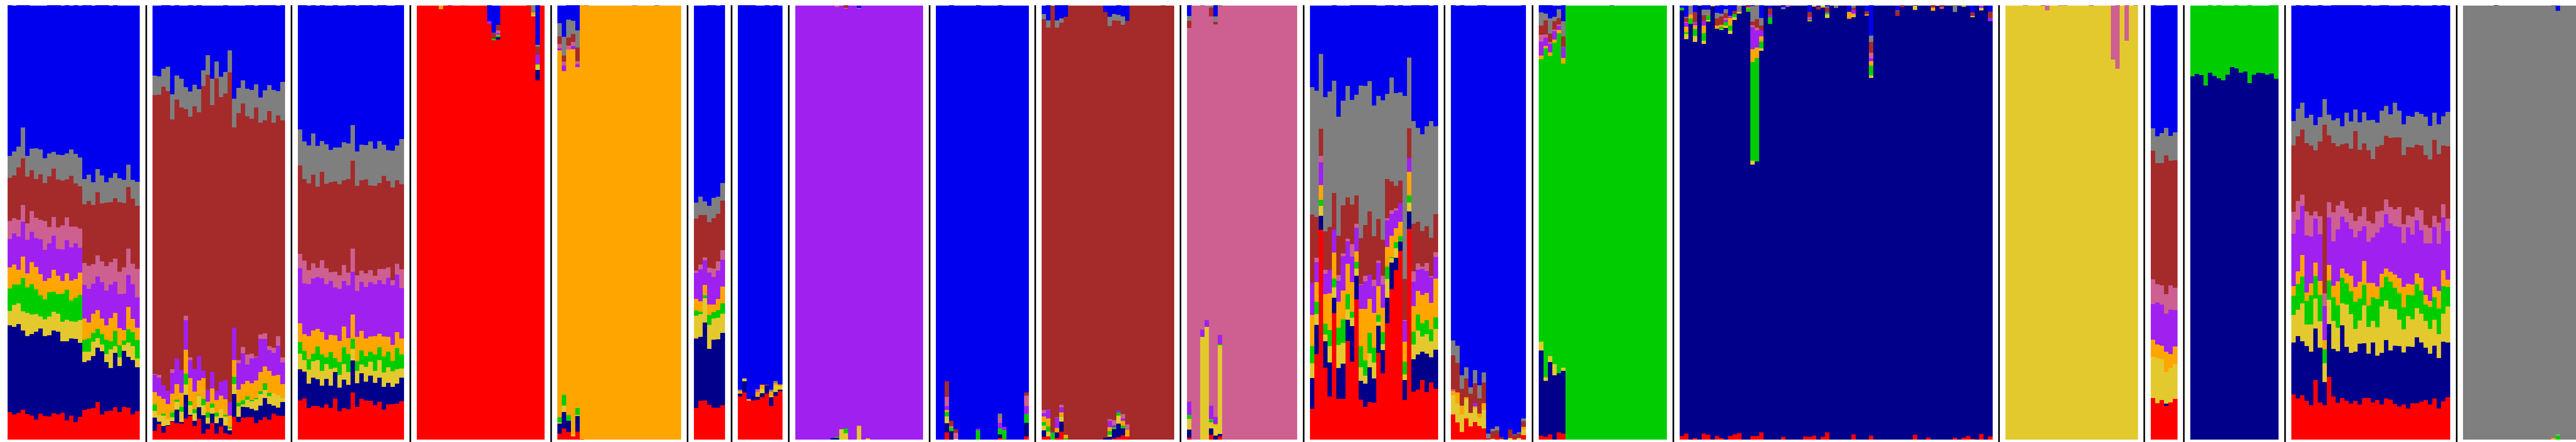

AoB

AS

CW

KJ

Kt

LMF NH

OMF

PC

Pm

RBB

RC

RIR

RW1

RW2

Ush

UshF

WL

YC

ZS

Ancestry

1.0  
0.8  
0.6  
0.4  
0.2  
0.0

K=11

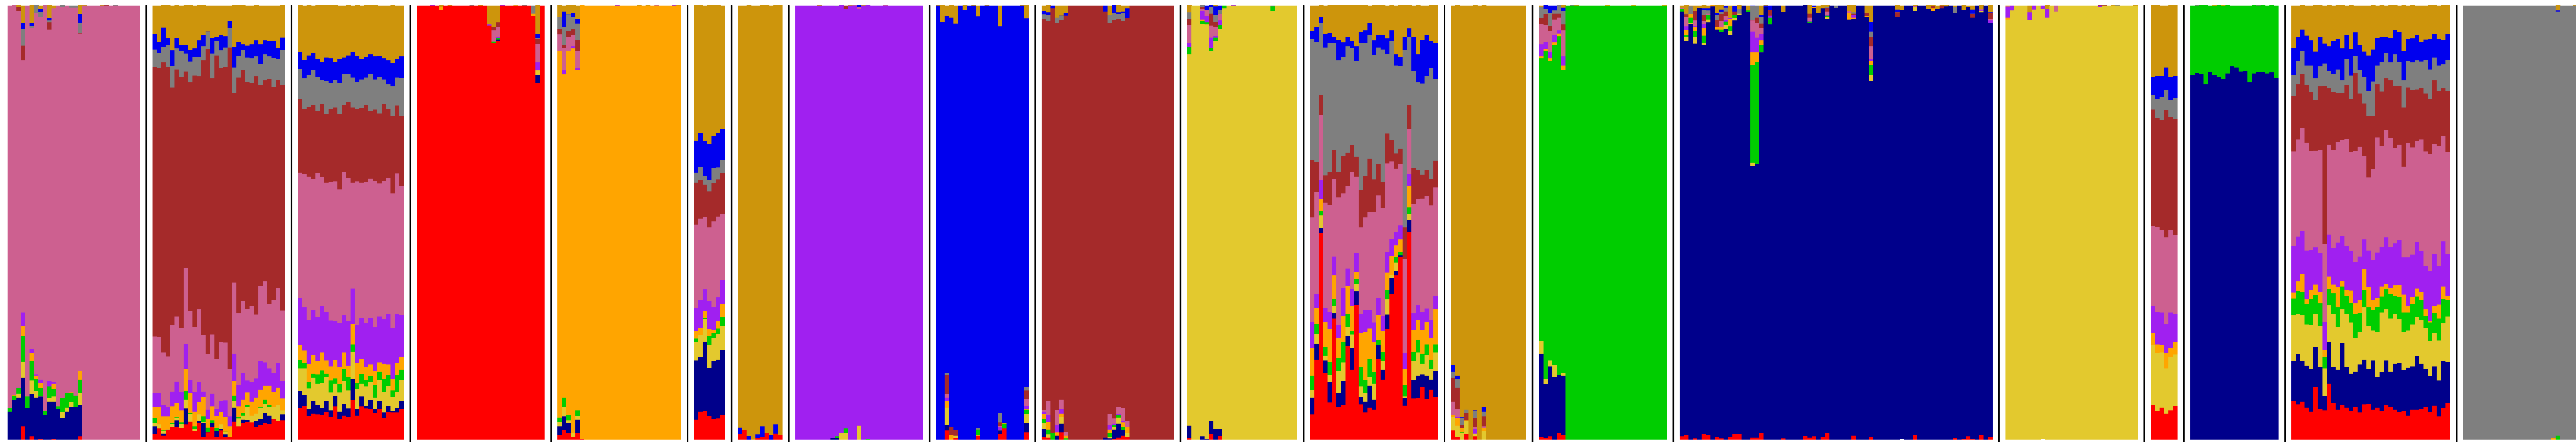

AoB

AS

CW

KJ

Kt

LMF NH

OMF

PC

Pm

RBB

RC

RIR

RW1

RW2

Ush

UshF

WL

YC

ZS

Ancestry

1.0  
0.8  
0.6  
0.4  
0.2  
0.0

K=12

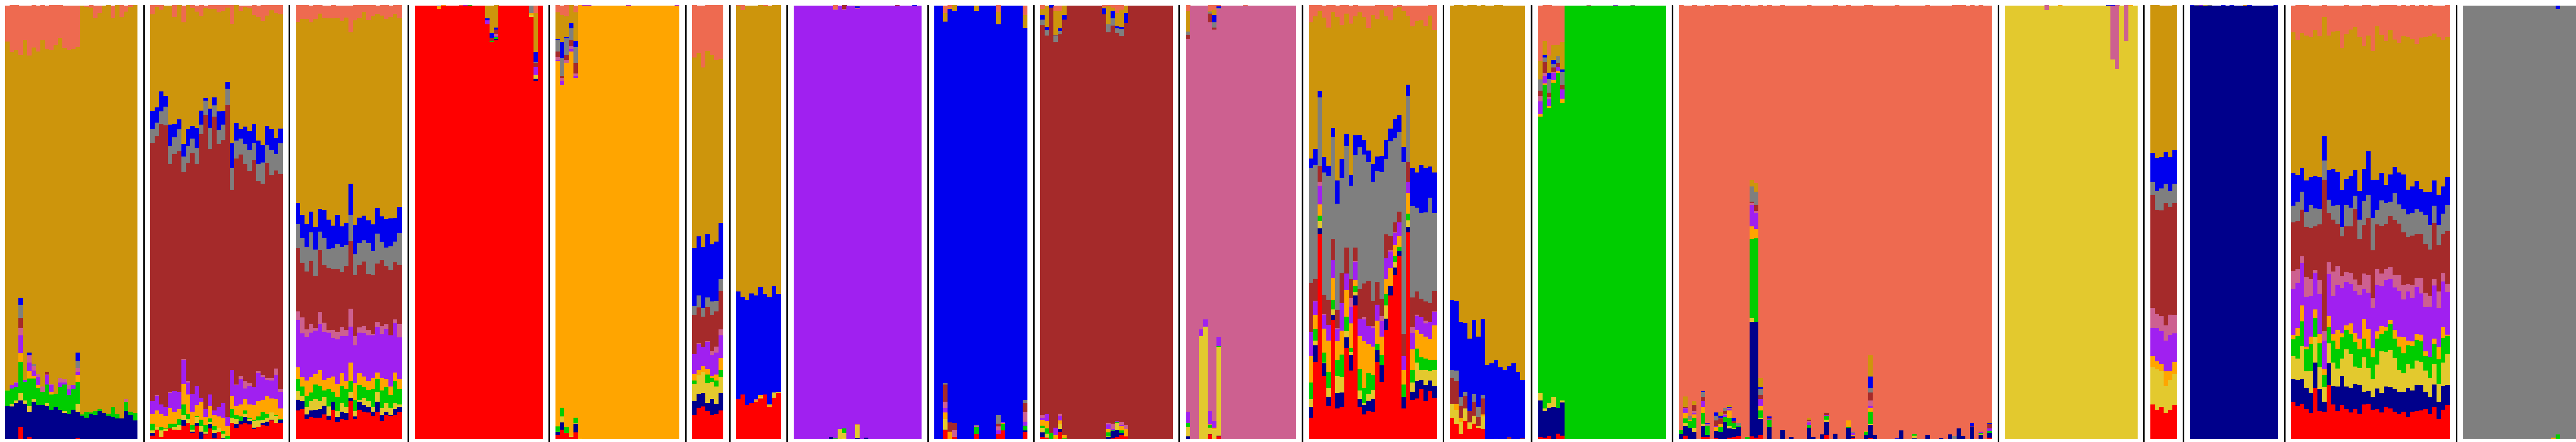

AoB

AS

CW

KJ

Kt

LMF

NH

OMF

PC

Pm

RBB

RC

RIR

RW1

RW2

Ush

UshF

WL

YC

ZS

Ancestry

1.0  
0.8  
0.6  
0.4  
0.2  
0.0

K=13

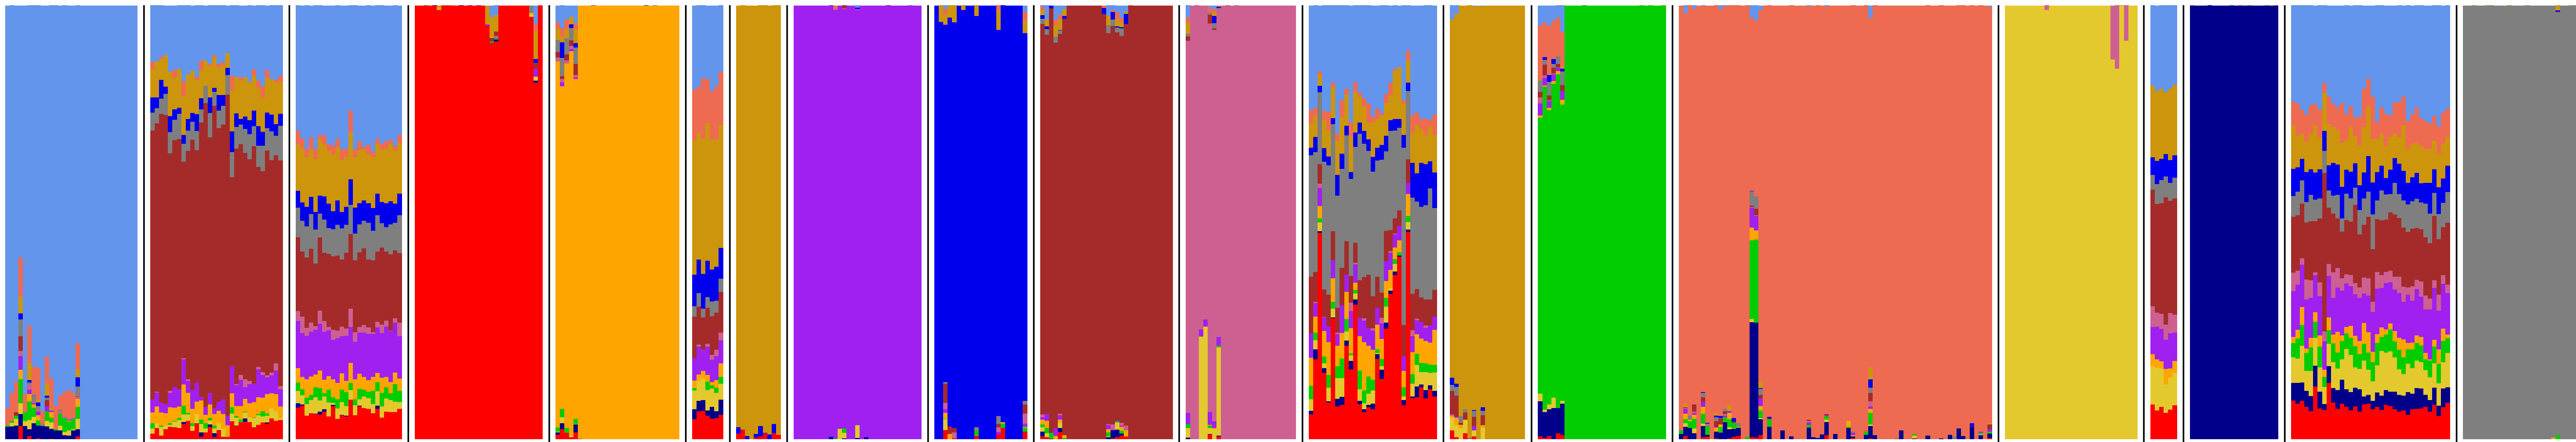

AoB

AS

CW

KJ

Kt

LMF NH

OMF

PC

Pm

RBB

RC

RIR

RW1

RW2

Ush

UshF

WL

YC

ZS

Ancestry

K=14

1.0  
0.8  
0.6  
0.4  
0.2  
0.0

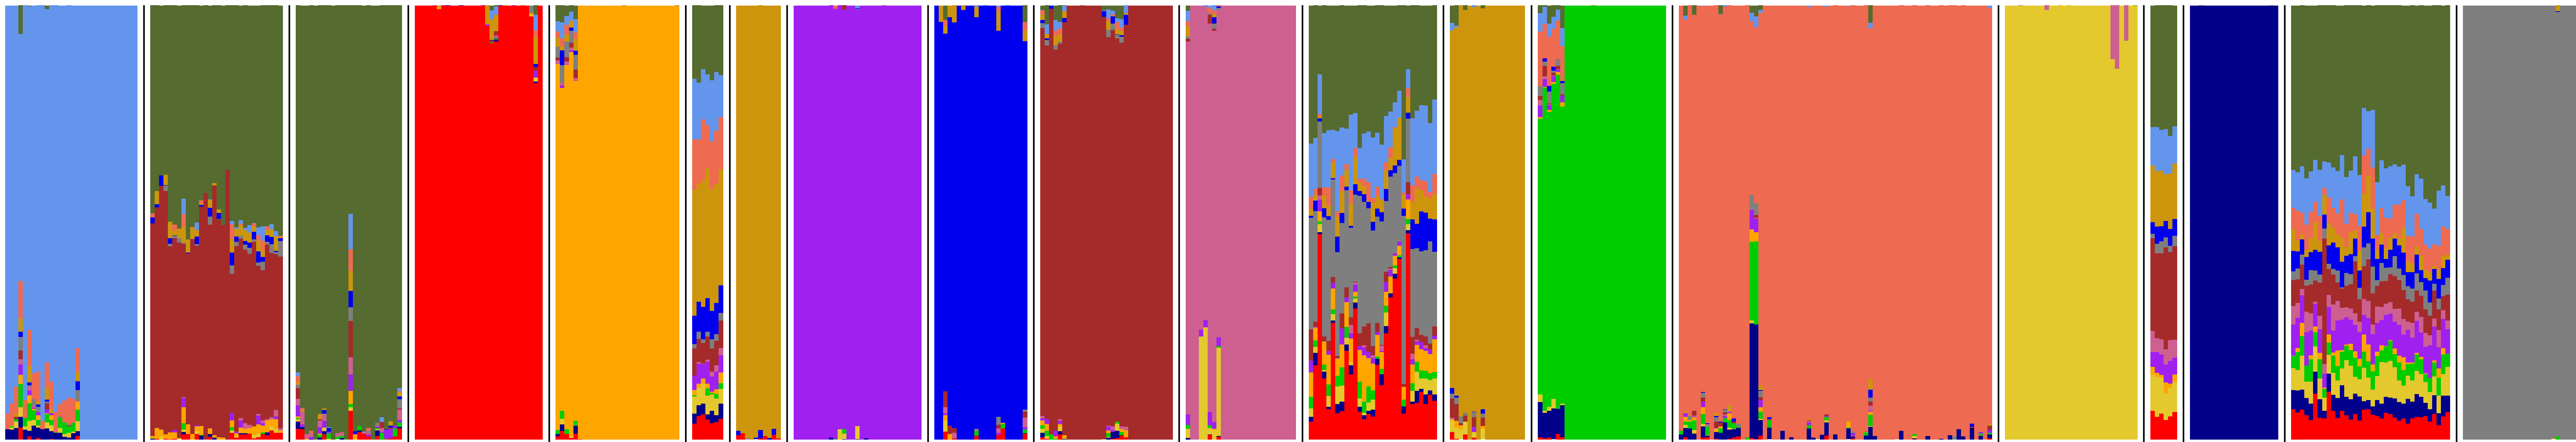

AoB

AS

CW

KJ

Kt

LMF NH

OMF

PC

Pm

RBB

RC

RIR

RW1

RW2

Ush

UshF

WL

YC

ZS

Ancestry

K=15

1.0  
0.8  
0.6  
0.4  
0.2  
0.0

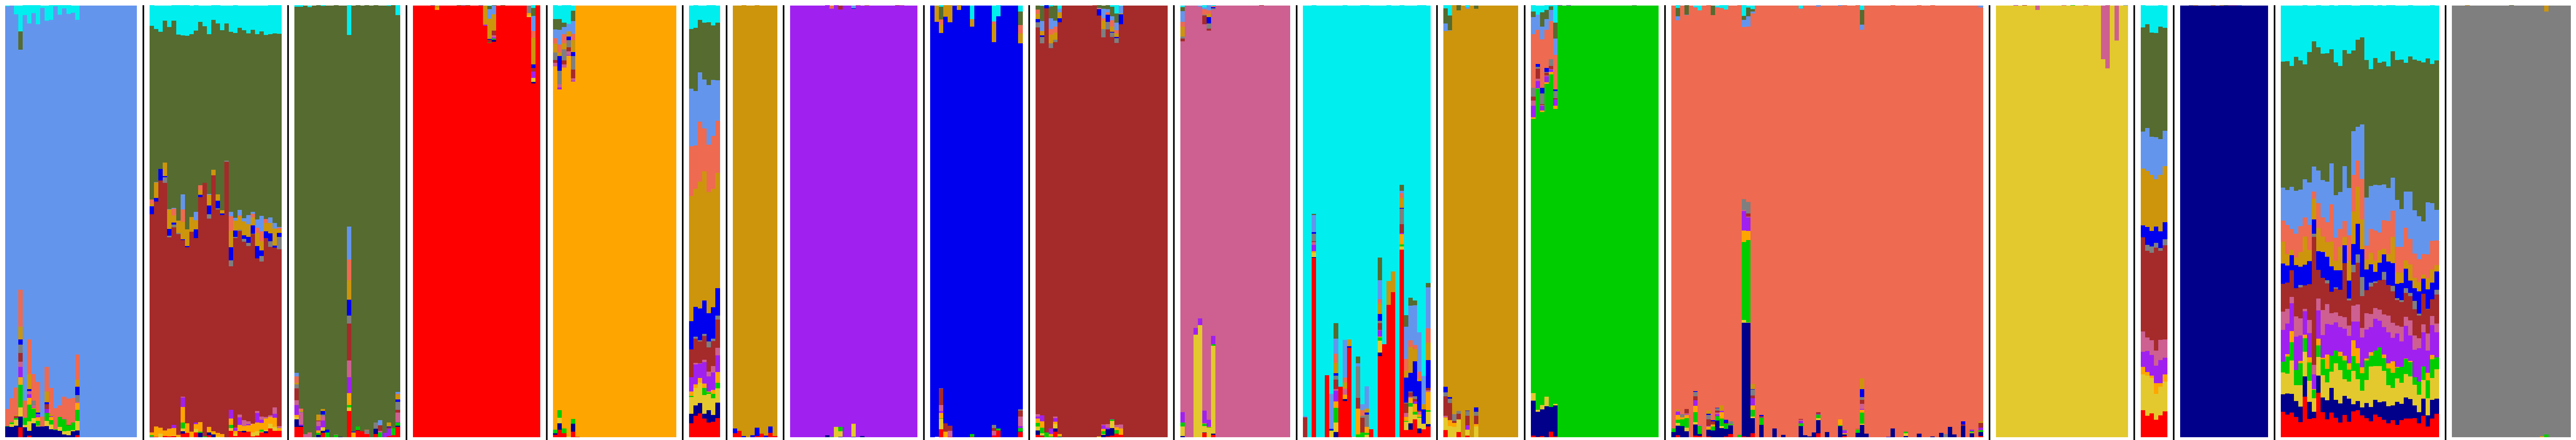

AoB

AS

CW

KJ

Kt

LMF NH

OMF

PC

Pm

RBB

RC

RIR

RW1

RW2

Ush

UshF

WL

YC

ZS

Ancestry

1.0  
0.8  
0.6  
0.4  
0.2  
0.0

K=16

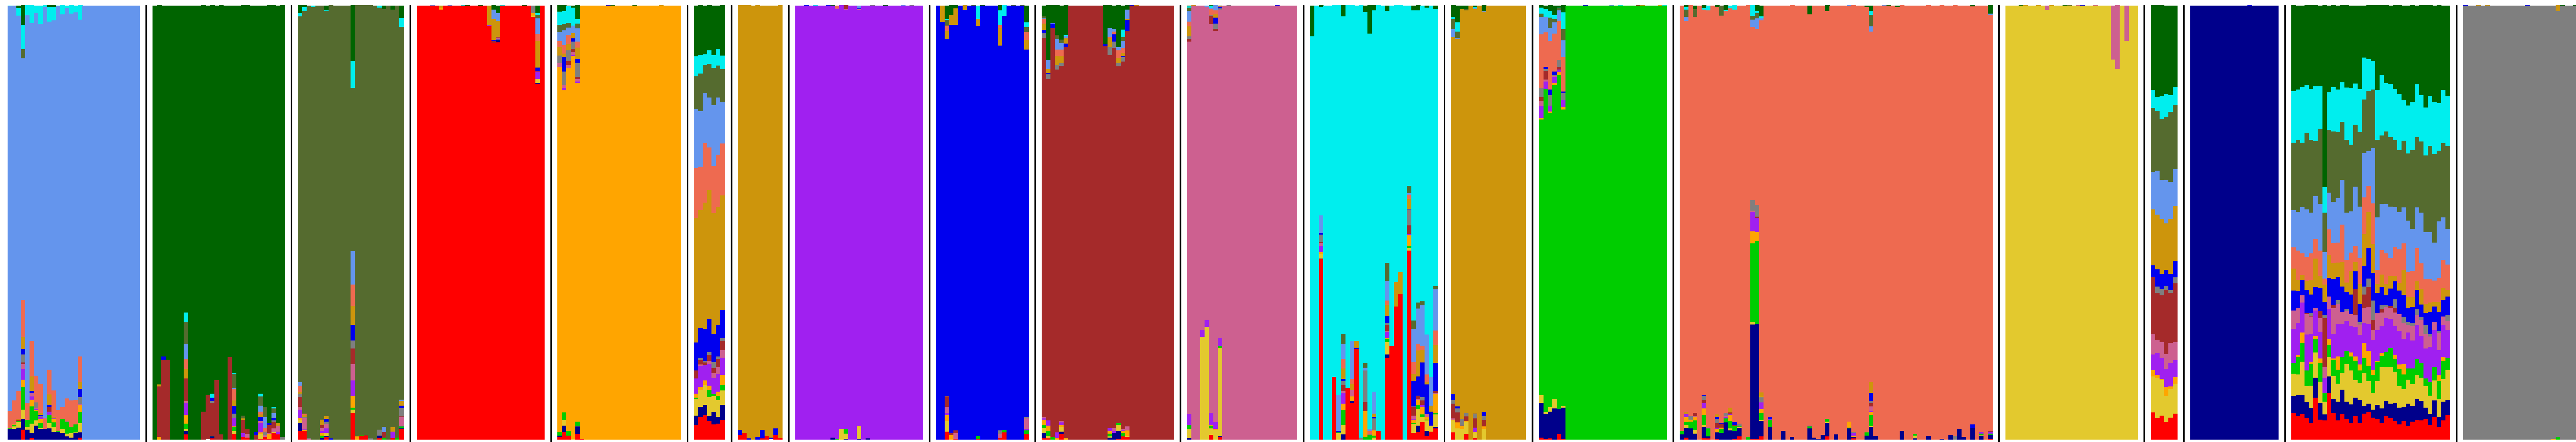

AoB

AS

CW

KJ

Kt

LMF NH

OMF

PC

Pm

RBB

RC

RIR

RW1

RW2

Ush

UshF

WL

YC

ZS

Ancestry

1.0  
0.8  
0.6  
0.4  
0.2  
0.0

K=17

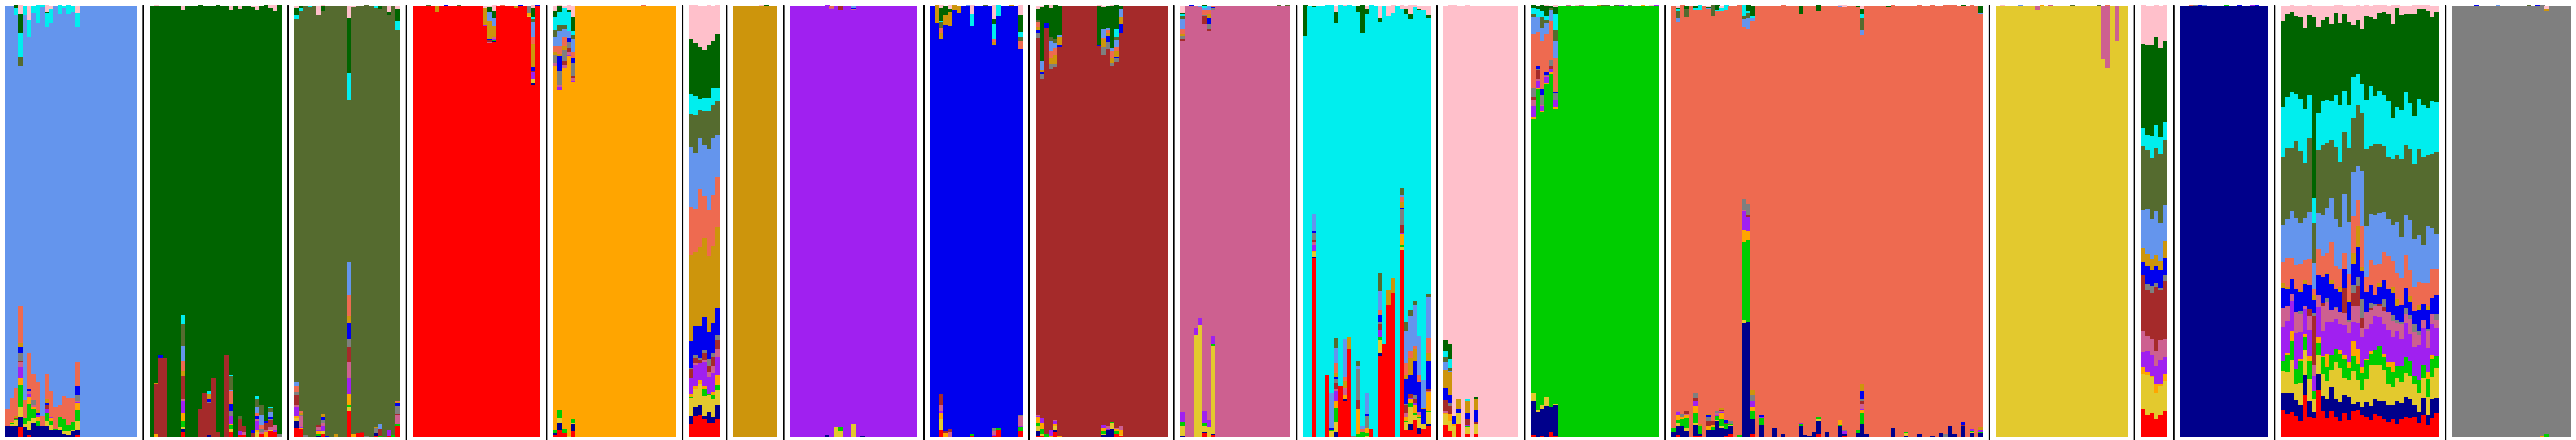

AoB

AS

CW

KJ

Kt

LMF NH

OMF

PC

Pm

RBB

RC

RIR

RW1

RW2

Ush

UshF

WL

YC

ZS



Ancestry

1.0  
0.8  
0.6  
0.4  
0.2  
0.0

K=18

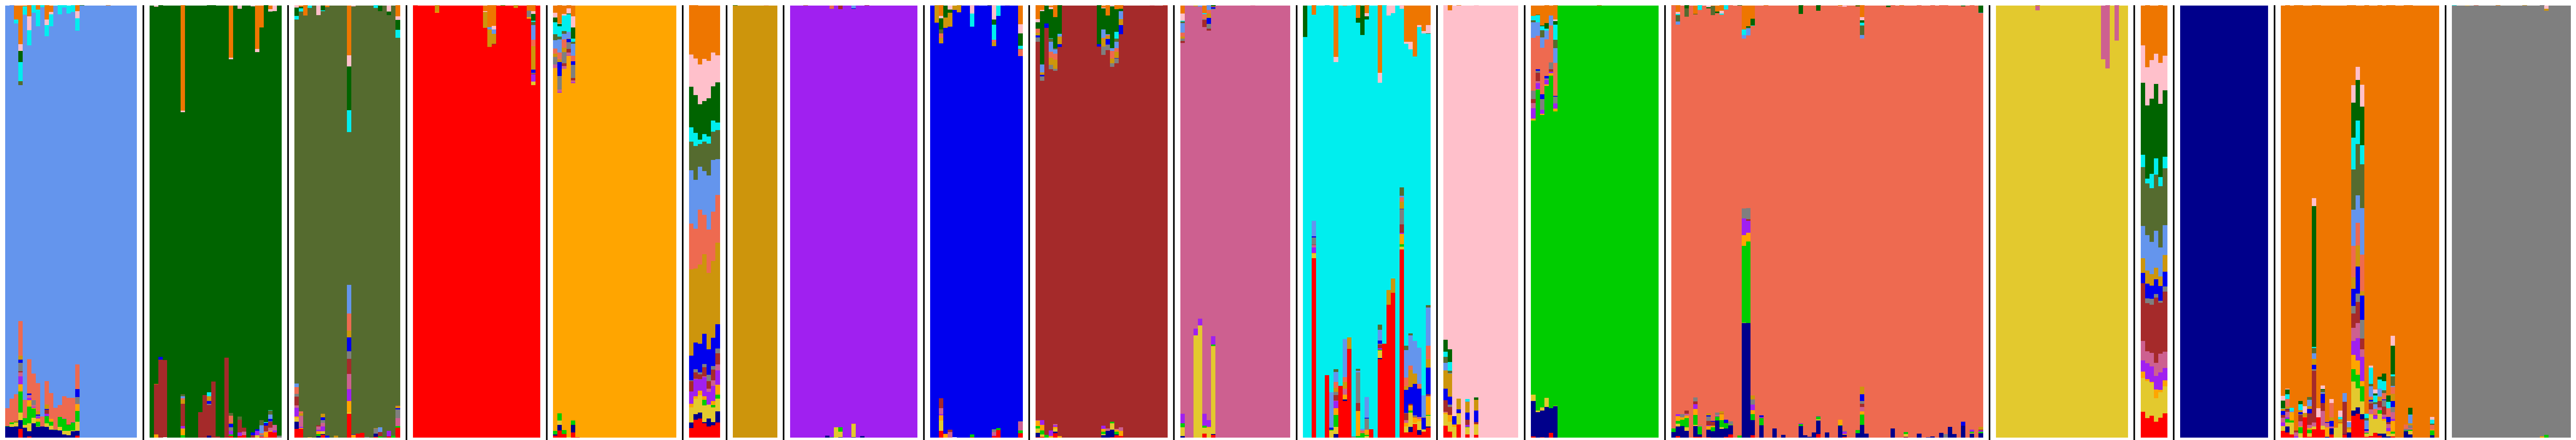

AoB

AS

CW

KJ

Kt

LMF NH

OMF

PC

Pm

RBB

RC

RIR

RW1

RW2

Ush

UshF

WL

YC

ZS

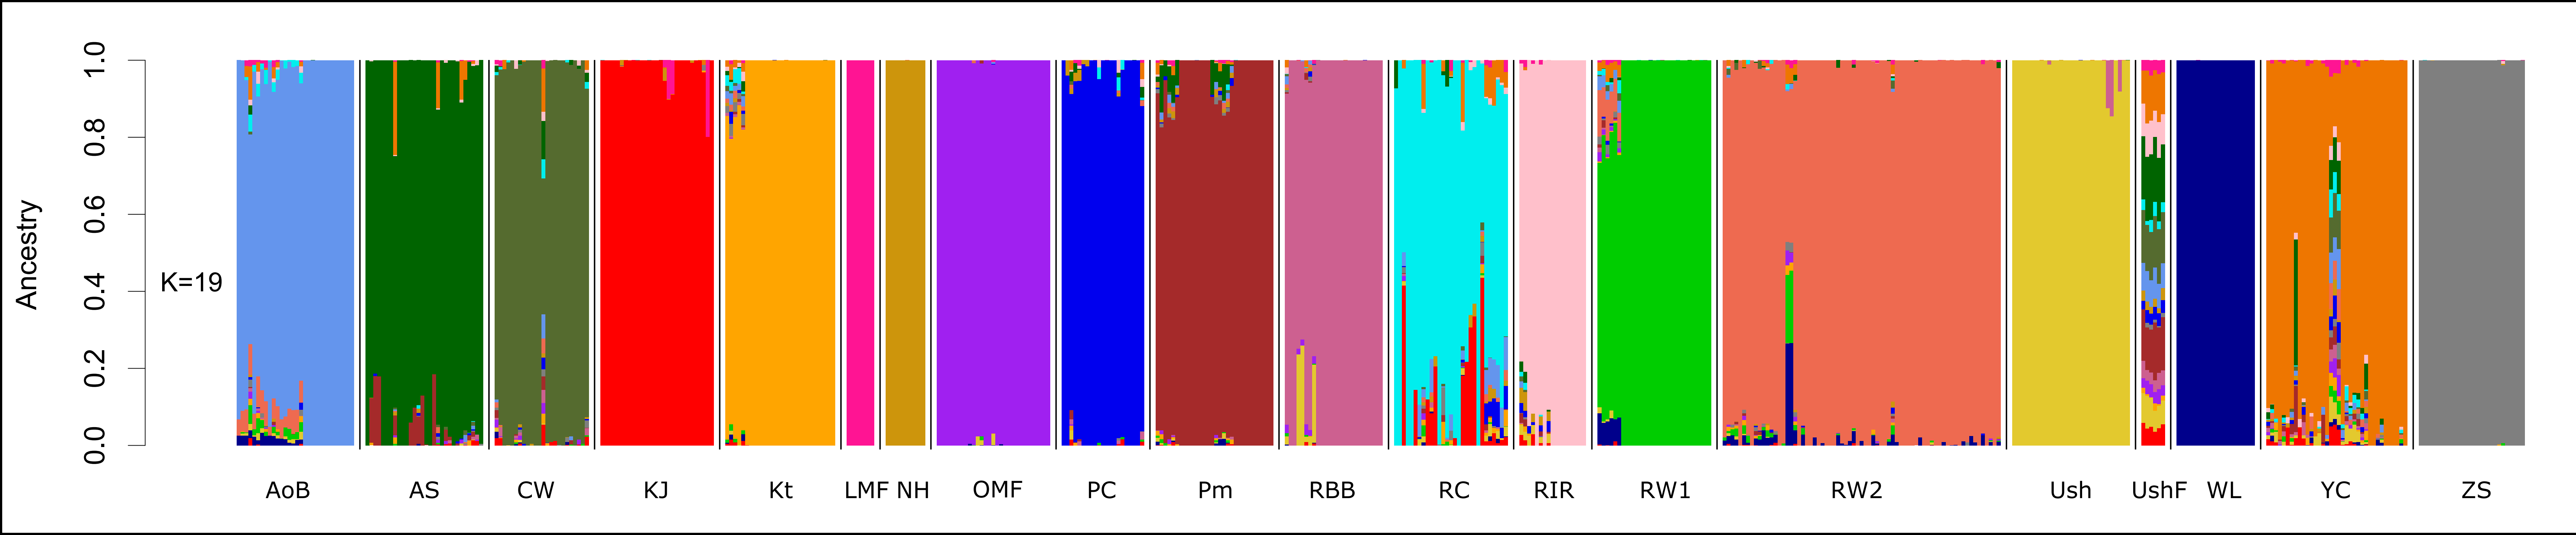

Ancestry

1.0  
0.8  
0.6  
0.4  
0.2  
0.0

K=20

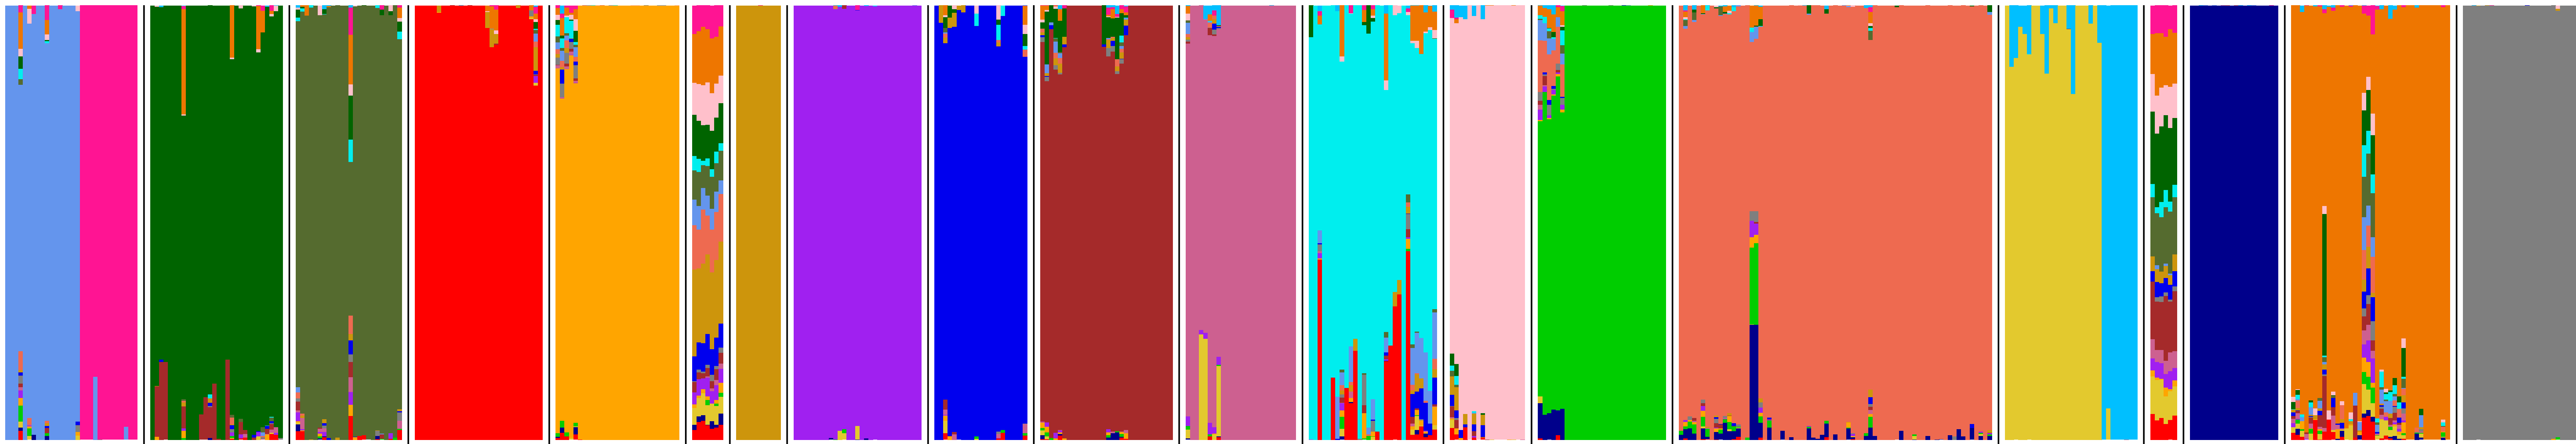

AoB

AS

CW

KJ

Kt

LMF NH

OMF

PC

Pm

RBB

RC

RIR

RW1

RW2

Ush

UshF

WL

YC

ZS

Ancestry

1.0  
0.8  
0.6  
0.4  
0.2  
0.0

K=21

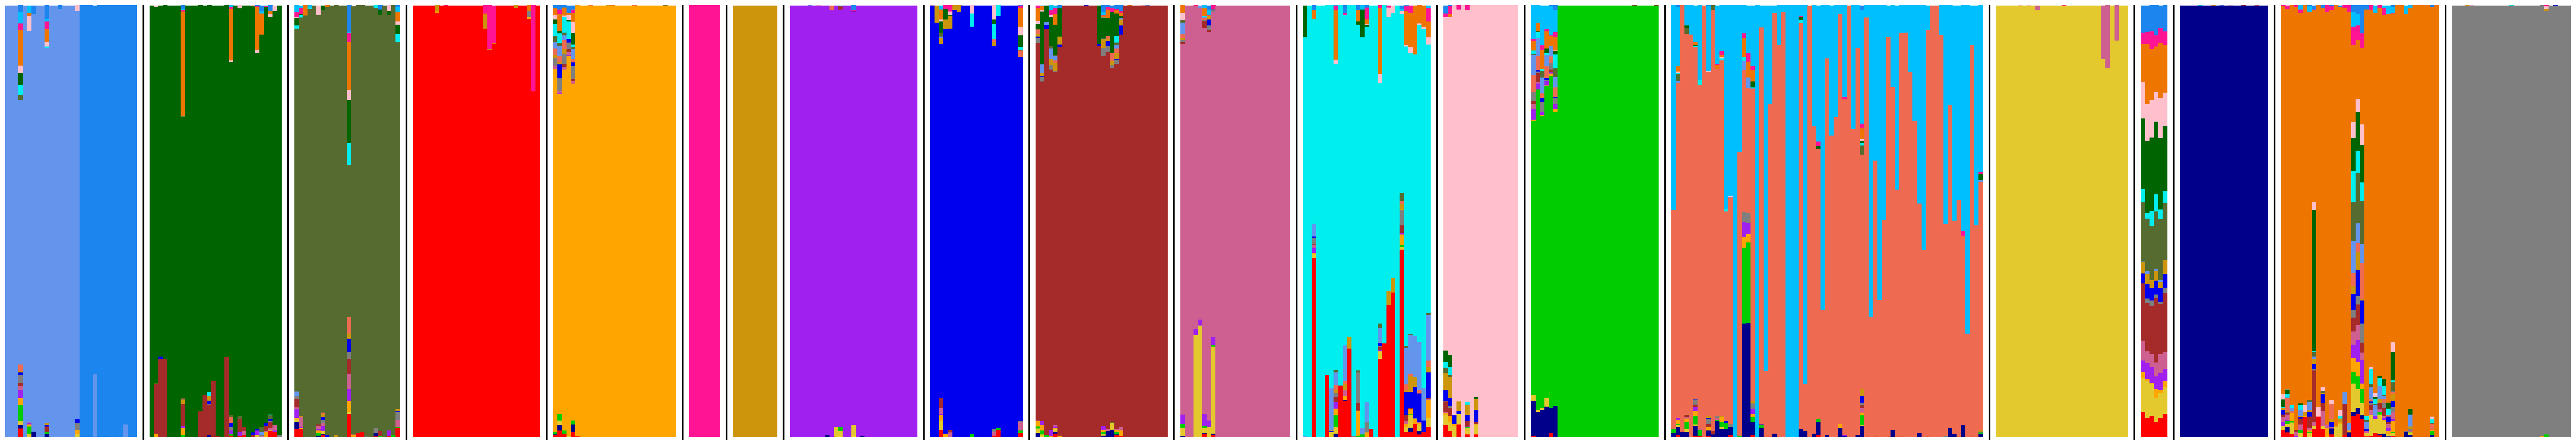

AoB

AS

CW

KJ

Kt

LMF NH

OMF

PC

Pm

RBB

RC

RIR

RW1

RW2

Ush

UshF

WL

YC

ZS

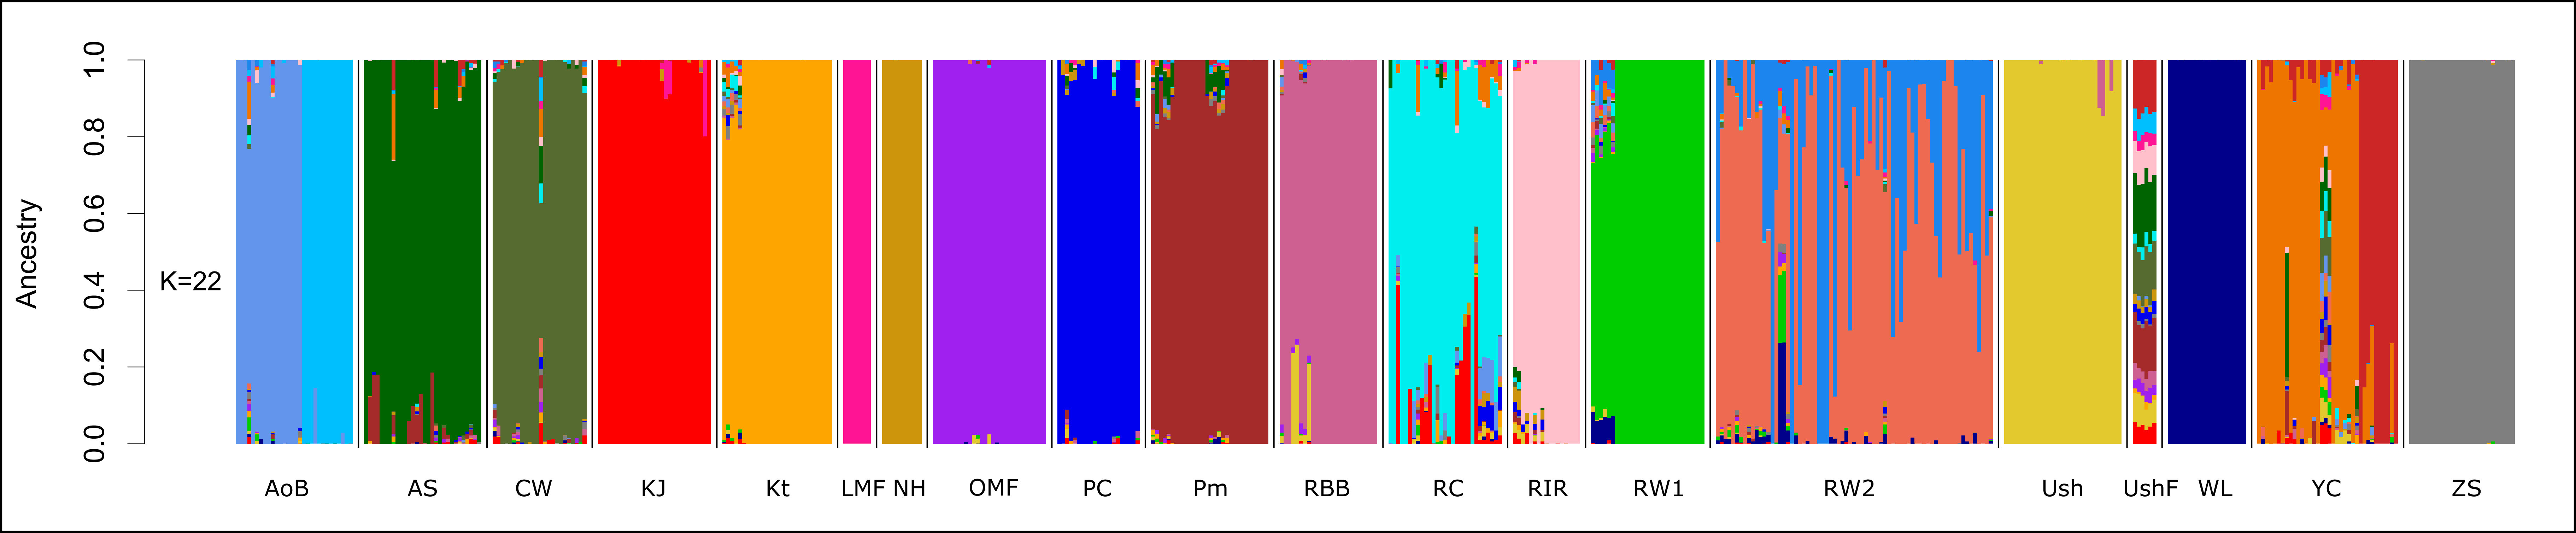

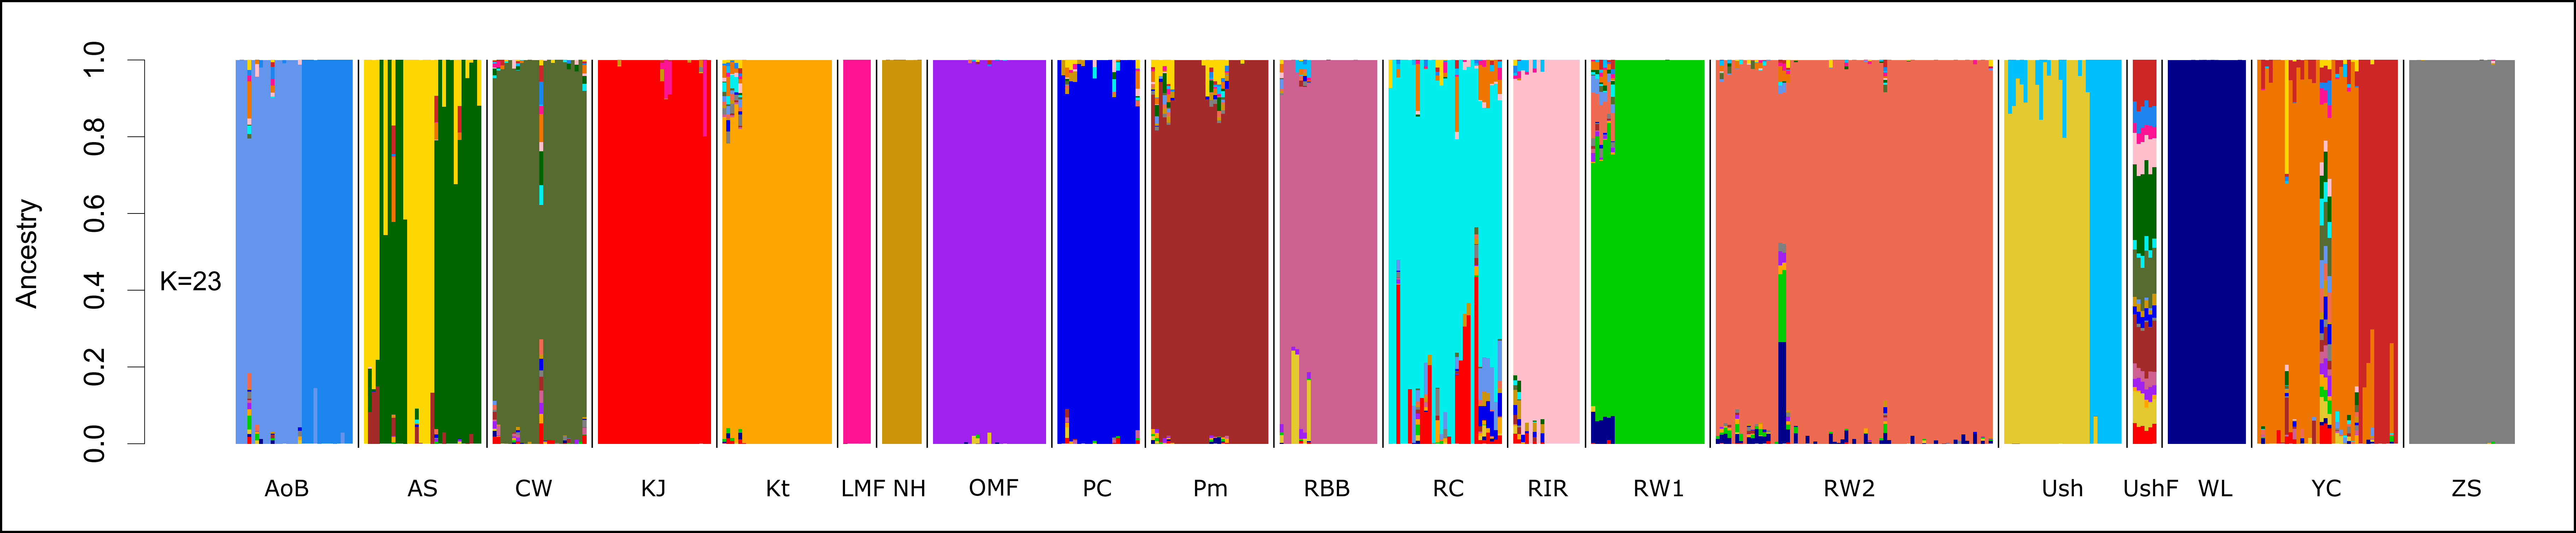

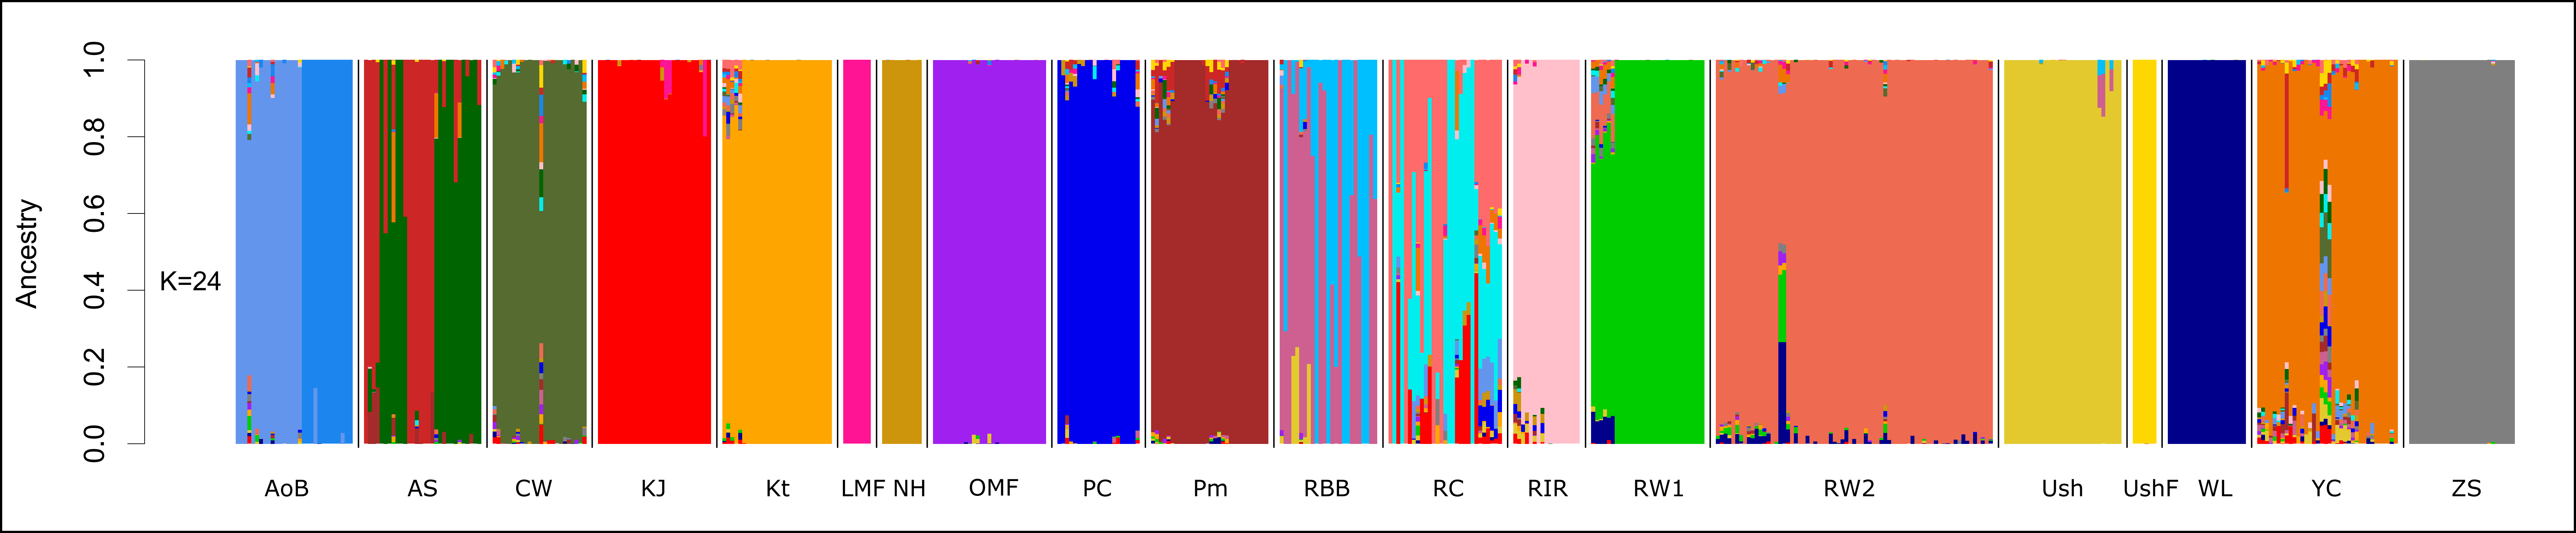

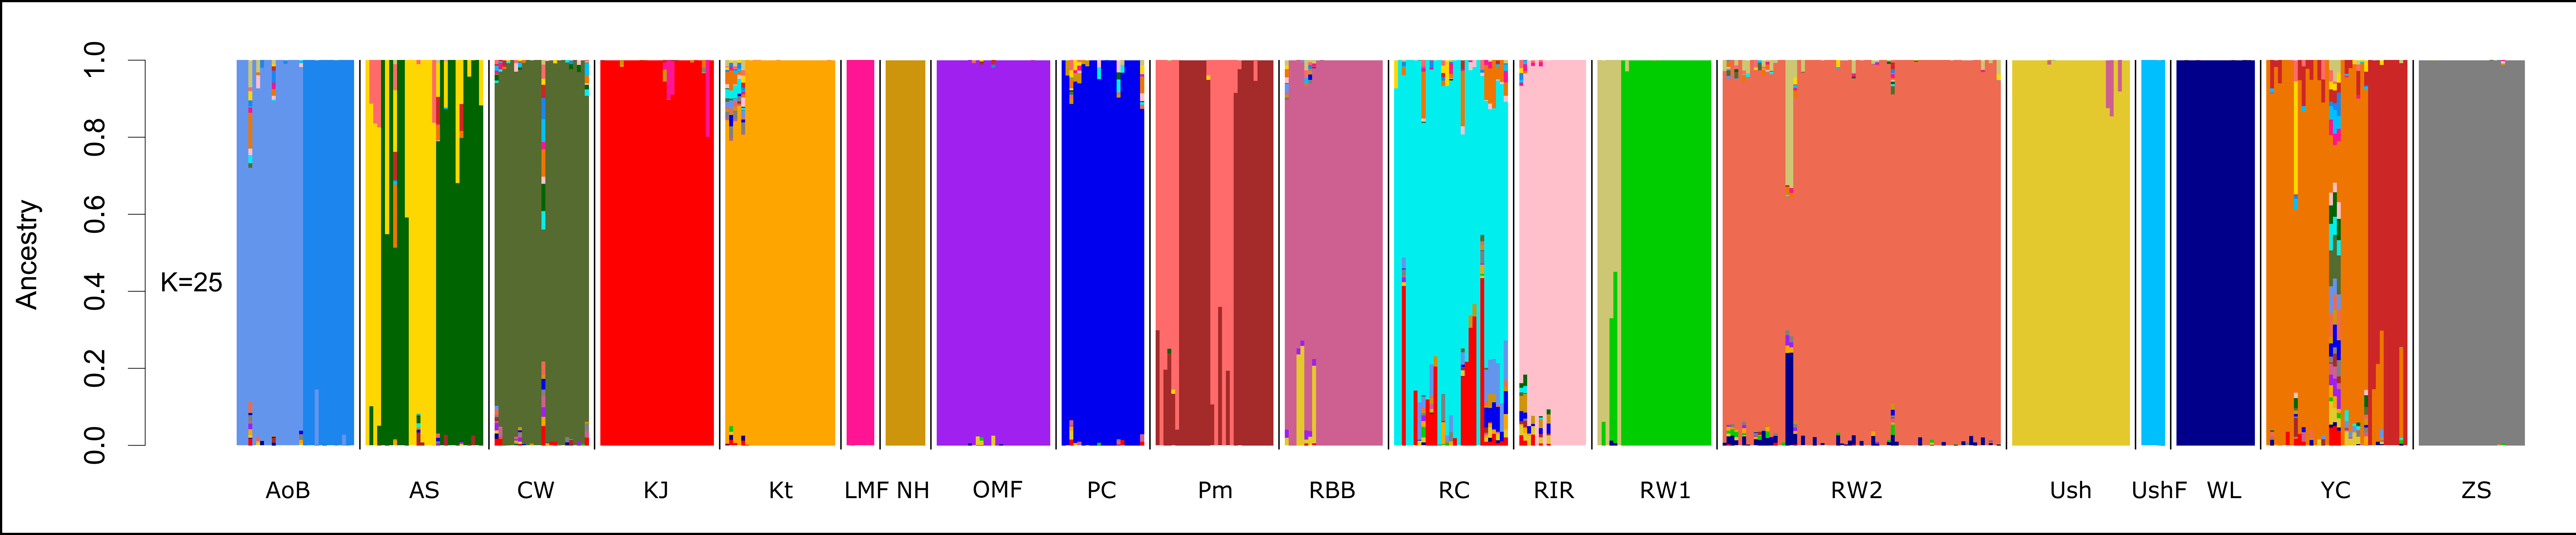



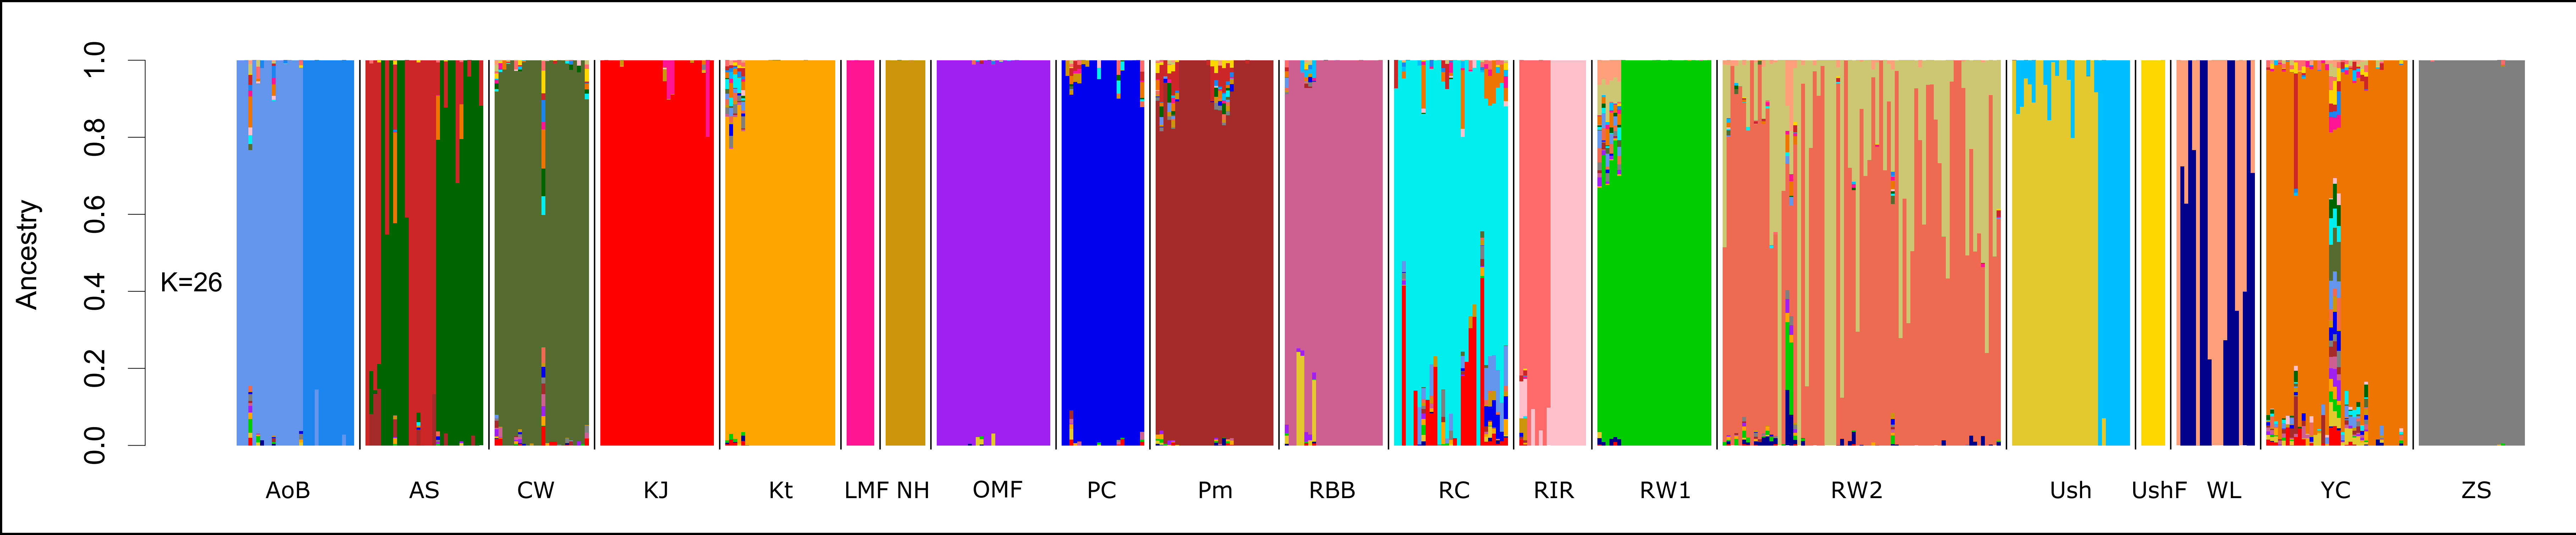

Supplement: s1 [file s1]
