# Supplementary material for: Whole Genome Screening Procures a Holistic Hold of the Russian Chicken Gene Pool Heritage and Demographic History
Source: MDPI journal article supplement (doi:10.3390/biology12070979), 2023-07-10
Supplement: s1 [file s1]

Archive with 7 entries (7 files):
- Suppl Figure S9 edited.pdf
- Suppl Figures S10¿CS15 edited.pdf
- Suppl Figures S1¿CS8 edited.pdf
- Suppl Table S1 edited.xlsx
- Suppl Table S2 edited.xls
- Suppl Table S3 edited.pdf
- Suppl Table S4.xls
