# Supplementary material for: Whole Genome Screening Procures a Holistic Hold of the Russian Chicken Gene Pool Heritage and Demographic History
Source: MDPI journal article supplement (doi:10.3390/biology12070979), 2023-07-10
Supplement: s1 [file s1]

**Supplementary Table S3:** Pairwise Reynolds et al. [61] distances between the chicken breeds studied.

|      | AS | AoB   | CW    | Kt    | WL    | LMF   | OMF   | PC    | Pm    | RIR   | RBB   | RC    | RW    | UshF  | Ush   | YC    | ZS    |
|------|----|-------|-------|-------|-------|-------|-------|-------|-------|-------|-------|-------|-------|-------|-------|-------|-------|
| AS   | *  | 0.490 | 0.449 | 0.524 | 0.621 | 0.562 | 0.507 | 0.558 | 0.425 | 0.532 | 0.536 | 0.450 | 0.489 | 0.549 | 0.535 | 0.400 | 0.517 |
| AoB  |    | *     | 0.478 | 0.545 | 0.622 | 0.579 | 0.523 | 0.584 | 0.517 | 0.560 | 0.547 | 0.469 | 0.489 | 0.582 | 0.545 | 0.426 | 0.538 |
| CW   |    |       | *     | 0.518 | 0.610 | 0.554 | 0.494 | 0.550 | 0.483 | 0.524 | 0.522 | 0.447 | 0.482 | 0.546 | 0.524 | 0.400 | 0.510 |
| Kt   |    |       |       | *     | 0.658 | 0.621 | 0.564 | 0.617 | 0.553 | 0.592 | 0.591 | 0.505 | 0.537 | 0.618 | 0.592 | 0.478 | 0.561 |
| WL   |    |       |       |       | *     | 0.694 | 0.631 | 0.704 | 0.639 | 0.691 | 0.666 | 0.608 | 0.541 | 0.707 | 0.671 | 0.567 | 0.648 |
| LMF  |    |       |       |       |       | *     | 0.597 | 0.639 | 0.587 | 0.611 | 0.621 | 0.557 | 0.574 | 0.645 | 0.619 | 0.518 | 0.612 |
| OMF  |    |       |       |       |       |       | *     | 0.599 | 0.531 | 0.577 | 0.553 | 0.494 | 0.505 | 0.595 | 0.549 | 0.444 | 0.552 |
| PC   |    |       |       |       |       |       |       | *     | 0.581 | 0.606 | 0.616 | 0.554 | 0.589 | 0.642 | 0.617 | 0.518 | 0.609 |
| Pm   |    |       |       |       |       |       |       |       | *     | 0.556 | 0.558 | 0.482 | 0.514 | 0.568 | 0.560 | 0.436 | 0.542 |
| RIR  |    |       |       |       |       |       |       |       |       | *     | 0.595 | 0.525 | 0.573 | 0.613 | 0.590 | 0.489 | 0.582 |
| RBB  |    |       |       |       |       |       |       |       |       |       | *     | 0.523 | 0.546 | 0.613 | 0.531 | 0.476 | 0.579 |
| RC   |    |       |       |       |       |       |       |       |       |       |       | *     | 0.471 | 0.554 | 0.522 | 0.390 | 0.478 |
| RW   |    |       |       |       |       |       |       |       |       |       |       |       | *     | 0.593 | 0.551 | 0.420 | 0.523 |
| UshF |    |       |       |       |       |       |       |       |       |       |       |       |       | *     | 0.611 | 0.515 | 0.611 |
| Ush  |    |       |       |       |       |       |       |       |       |       |       |       |       |       | *     | 0.474 | 0.581 |
| YC   |    |       |       |       |       |       |       |       |       |       |       |       |       |       |       | *     | 0.468 |
| ZS   |    |       |       |       |       |       |       |       |       |       |       |       |       |       |       |       | *     |

Note. Breed codes are given in Table 1.
