# Supplementary material for: Whole Genome Screening Procures a Holistic Hold of the Russian Chicken Gene Pool Heritage and Demographic History
Source: MDPI journal article supplement (doi:10.3390/biology12070979), 2023-07-10
Supplement: s1 [file s1]

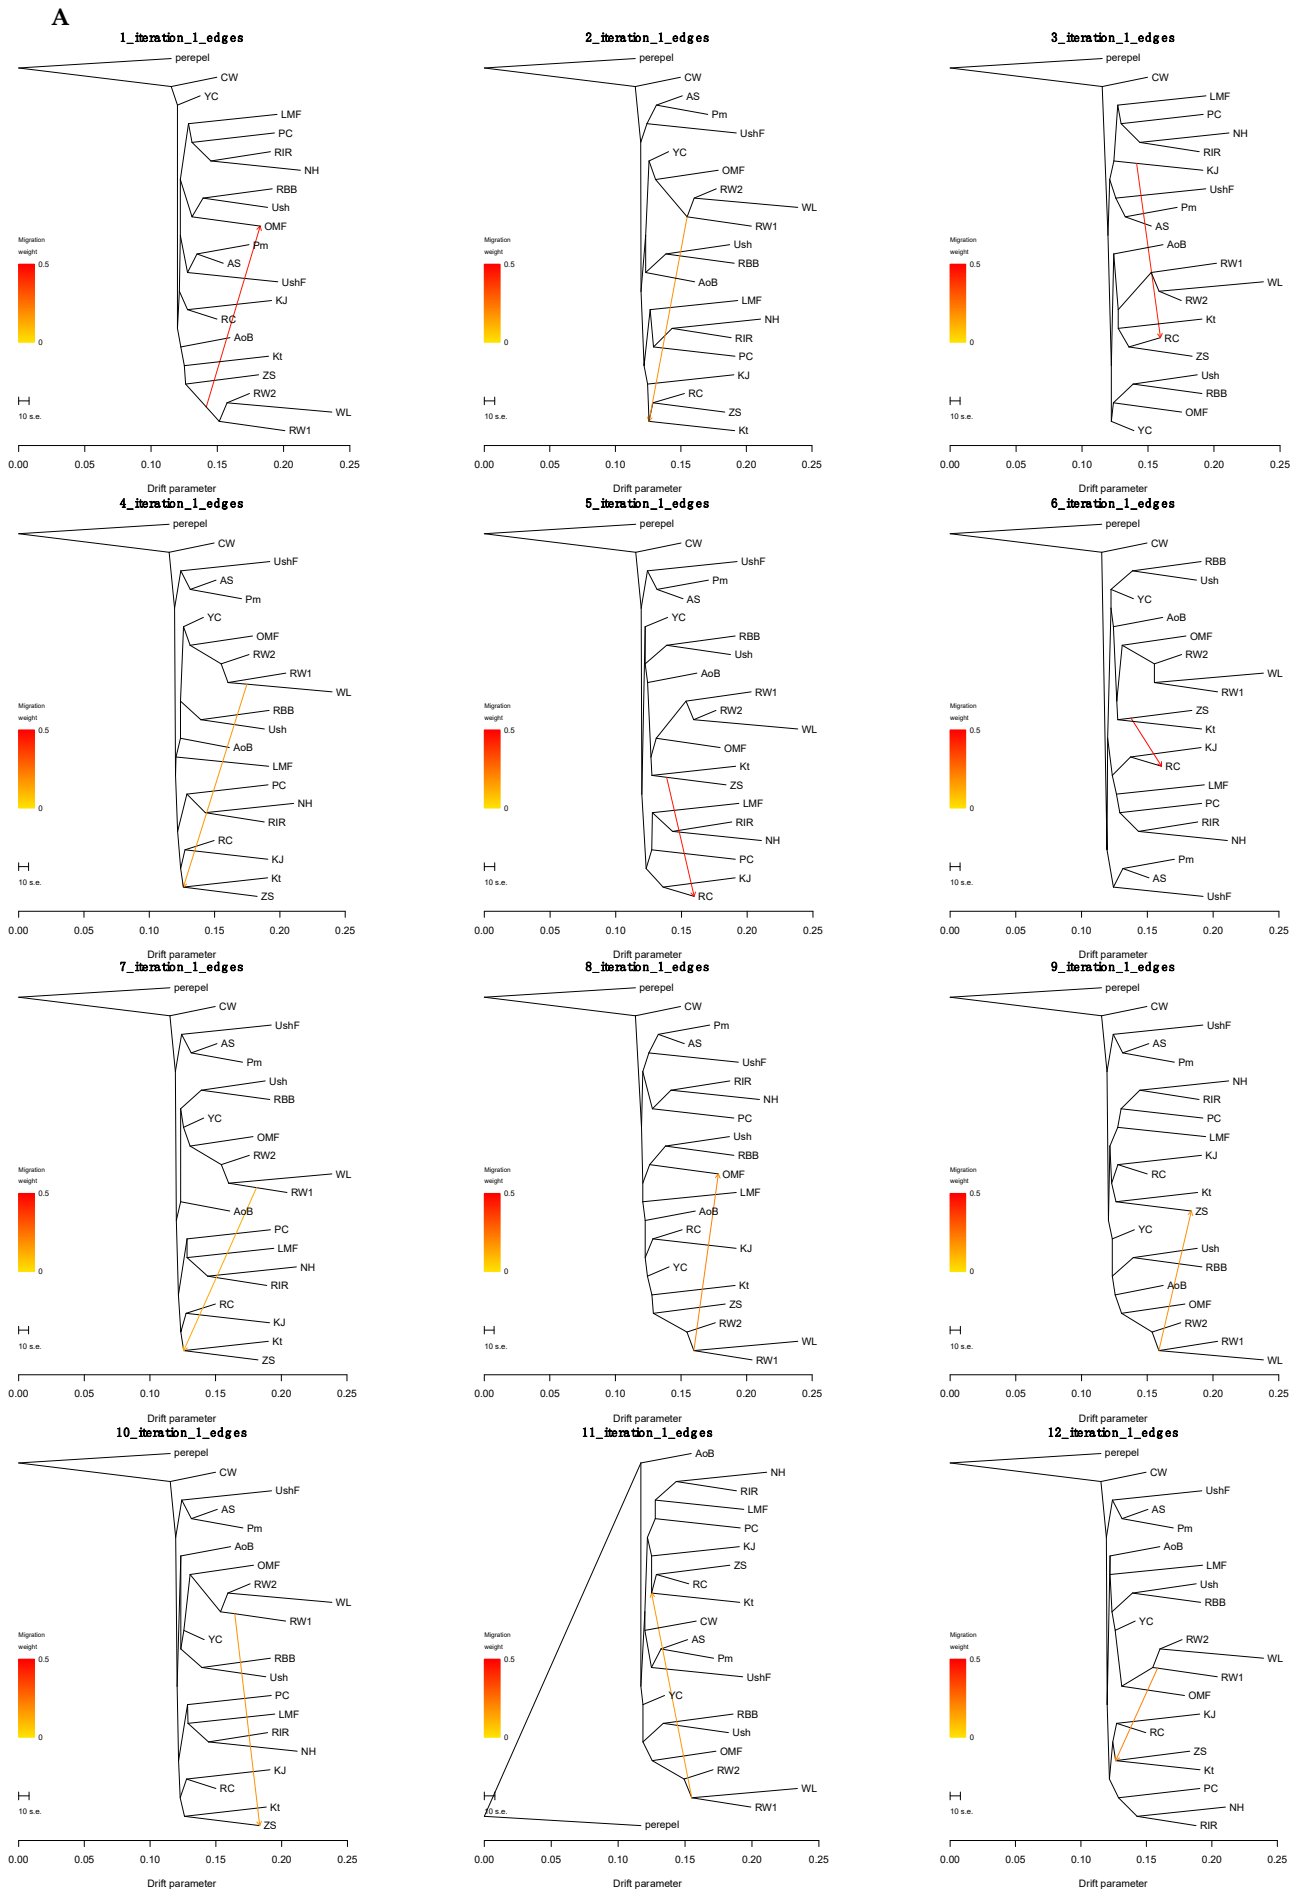

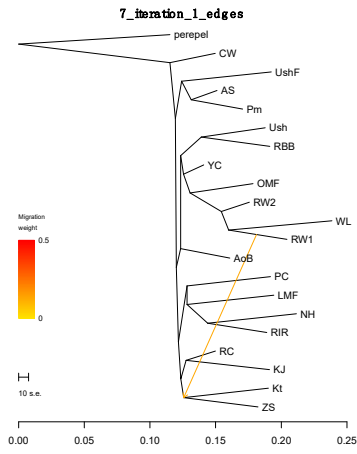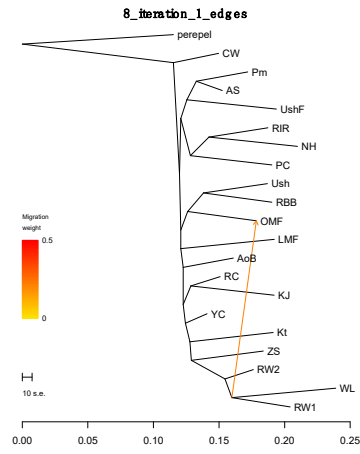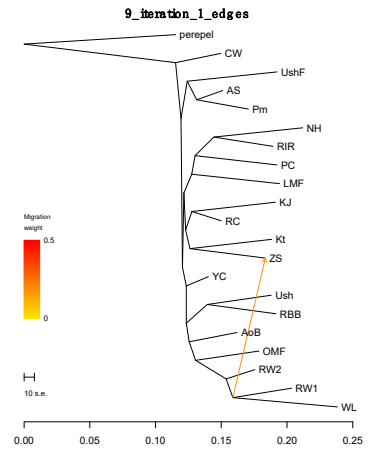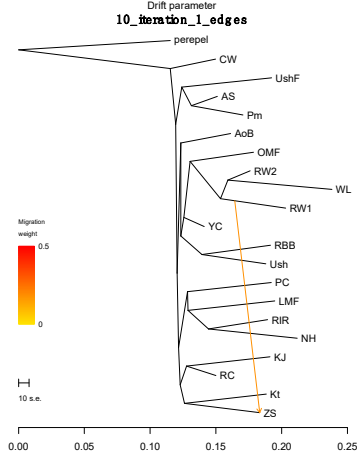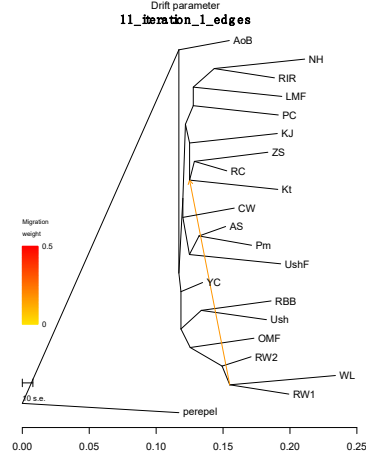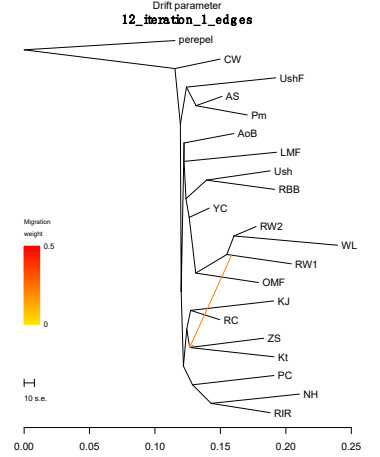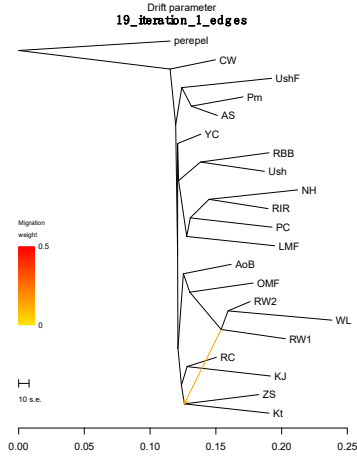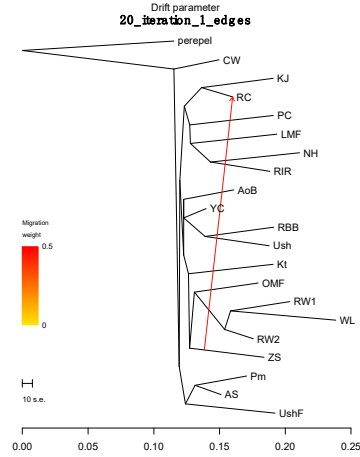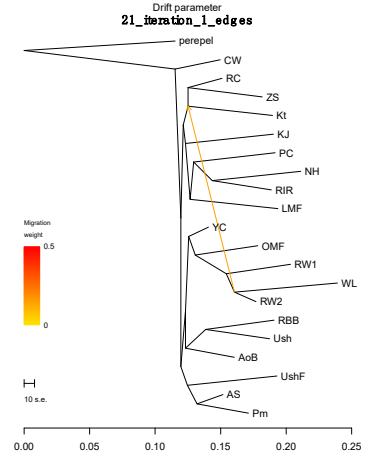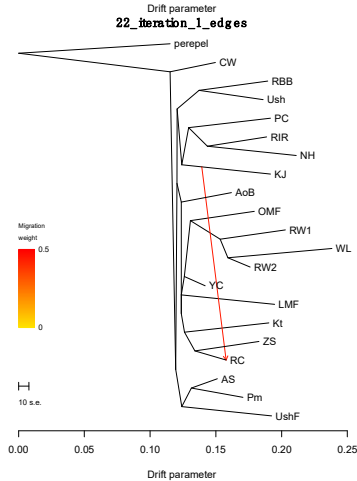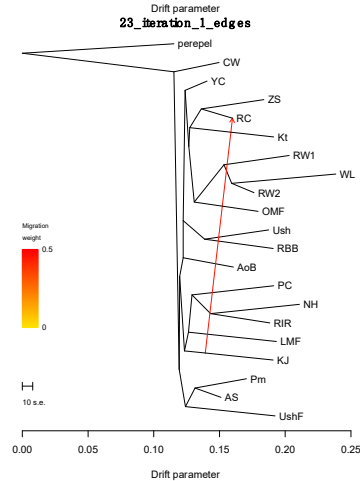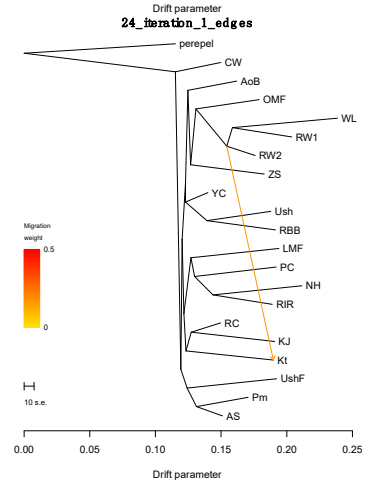

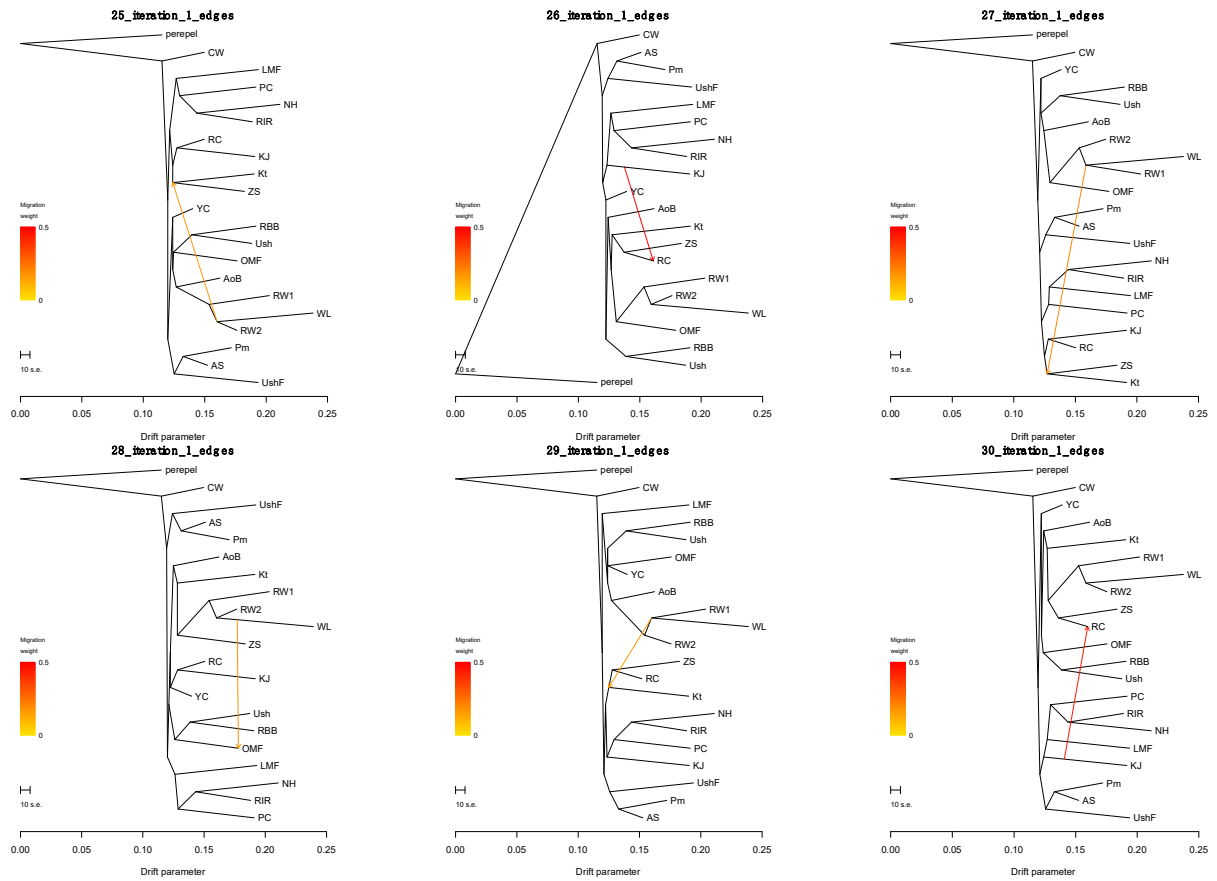

**Supplementary Figure S10A.** Assessment of the degree of divergence and the level of gene flow between the studied breeds. Rooted maximum likelihood trees with one migration event. Common quail (*C. coturnix*) was used as an outgroup; cut length 10 s.e. corresponds to ten times the average standard error (s.e.) estimated from the sample covariance matrix. Breed codes: AoB, Australorp Black; AS, Adler Silver; CW, Cornish White; KJ, Kuchino Jubilee; Kt, Kotlyarevsky; LMF, Leningrad Mille Fleur; NH, New Hampshire; OMF, Orloff Mille Fleur; PC, Poltava Clay; Pm, Pervomai; RBB, Russian Black Bearded; RC, Russian Crested; RIR, Rhode Island Red; RW1, Russian White (ARPTI); RW2, Russian White (RRIFAGB); Ush, Ushanka; UshF, Ushanka Foot-feathered; WL, White Leghorn; YC, Yurlov Crower; ZS, Zagorsk Salmon.

B

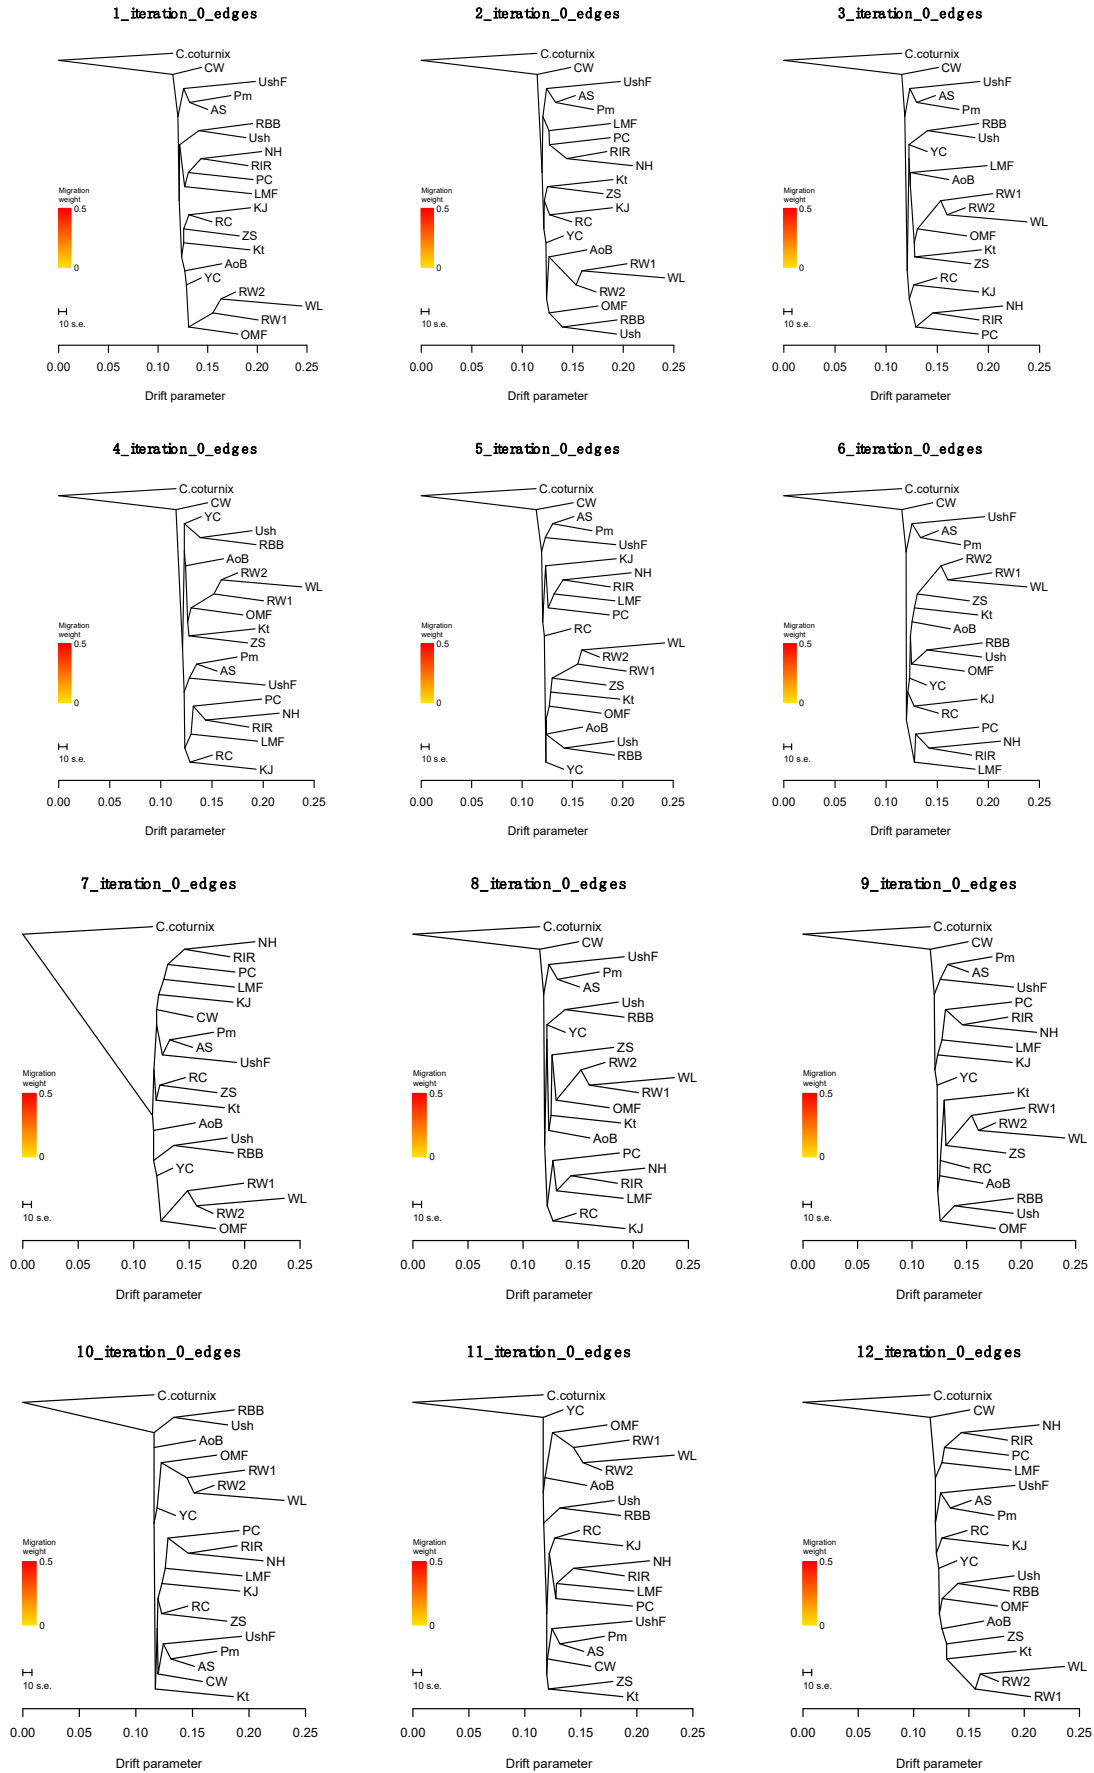

13\_iteration\_0\_edges

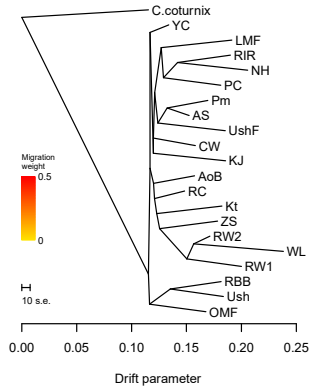

14\_iteration\_0\_edges

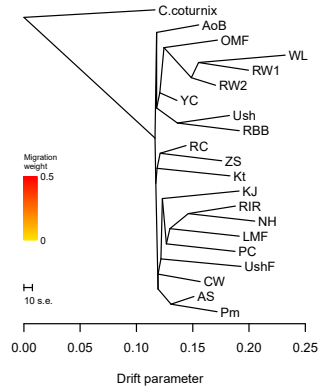

15\_iteration\_0\_edges

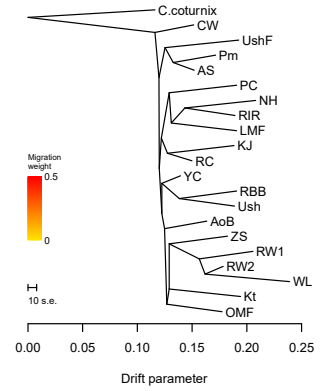

16\_iteration\_0\_edges

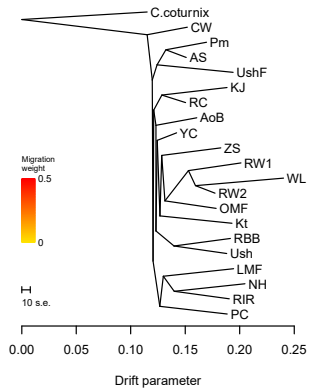

17\_iteration\_0\_edges

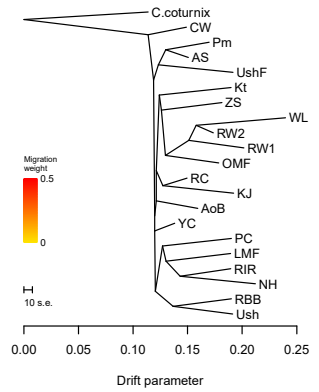

18\_iteration\_0\_edges

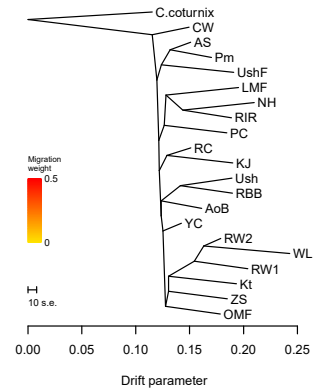

19\_iteration\_0\_edges

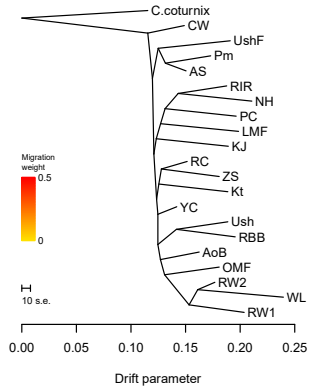

20\_iteration\_0\_edges

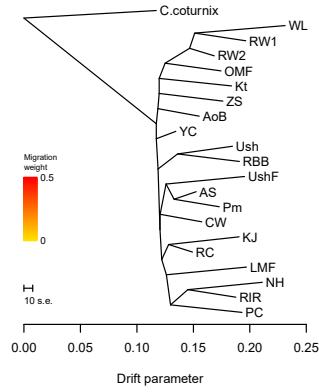

21\_iteration\_0\_edges

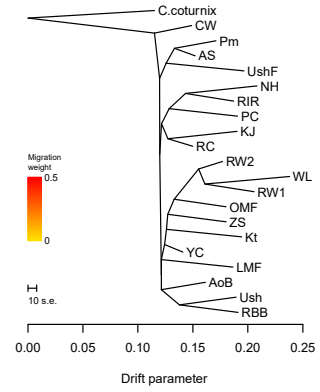

22\_iteration\_0\_edges

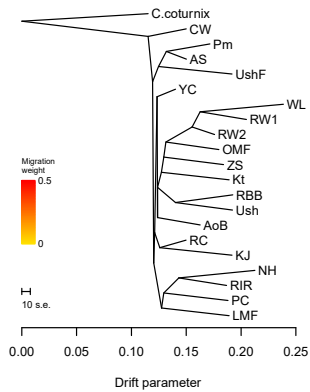

23\_iteration\_0\_edges

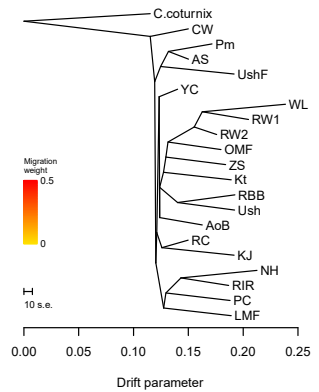

24\_iteration\_0\_edges

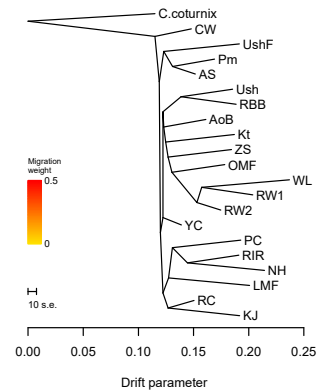

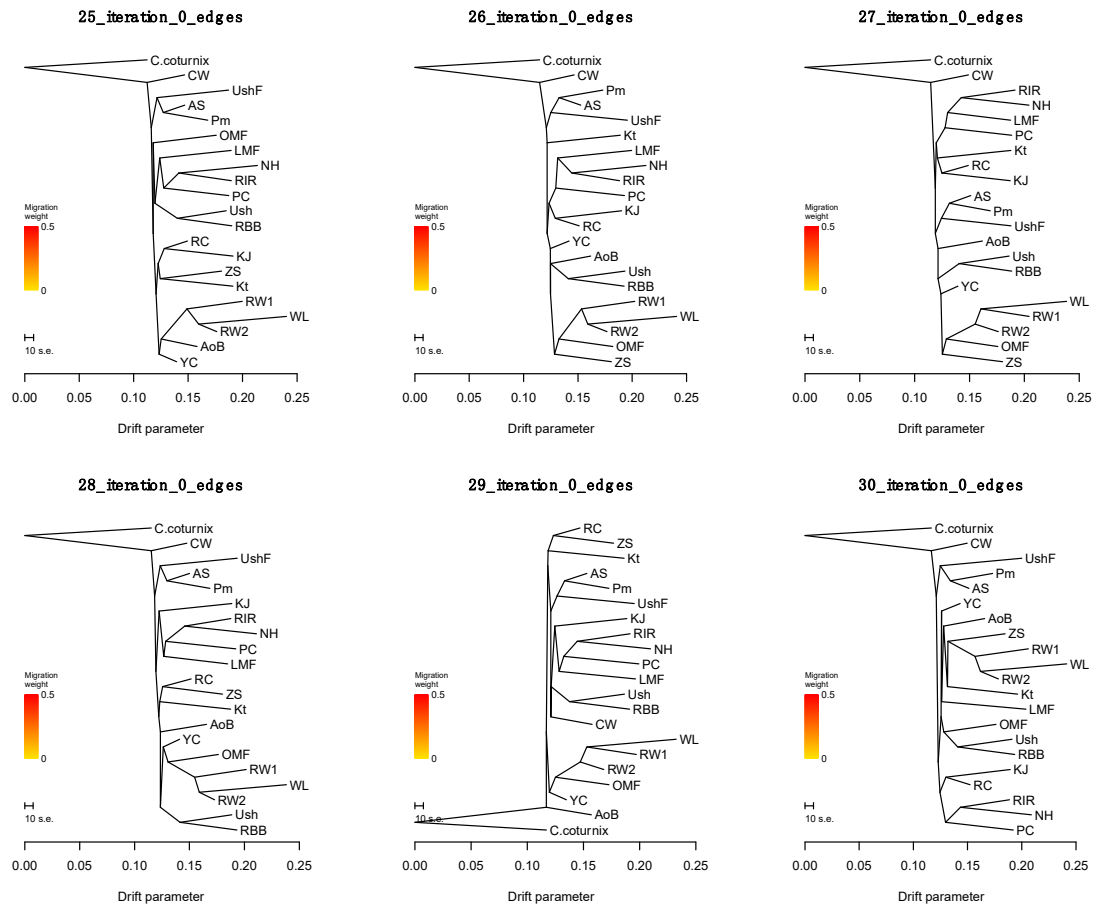

**Supplementary Figure S10B.** Same as Supplementary Figure S10A, except for rooted maximum likelihood trees with no migration event. Breed codes: AoB, Australorp Black; AS, Adler Silver; CW, Cornish White; KJ, Kuchino Jubilee; Kt, Kotlyarevsky; LMF, Leningrad Mille Fleur; NH, New Hampshire; OMF, Orloff Mille Fleur; PC, Poltava Clay; Pm, Pervomai; RBB, Russian Black Bearded; RC, Russian Crested; RIR, Rhode Island Red; RW1, Russian White (ARPRTI); RW2, Russian White (RRIFAGB); Ush, Ushanka; UshF, Ushanka Foot-feathered; WL, White Leghorn; YC, Yurlov Crower; ZS, Zagorsk Salmon. Outgroup: *C. coturnix*, quail.

C

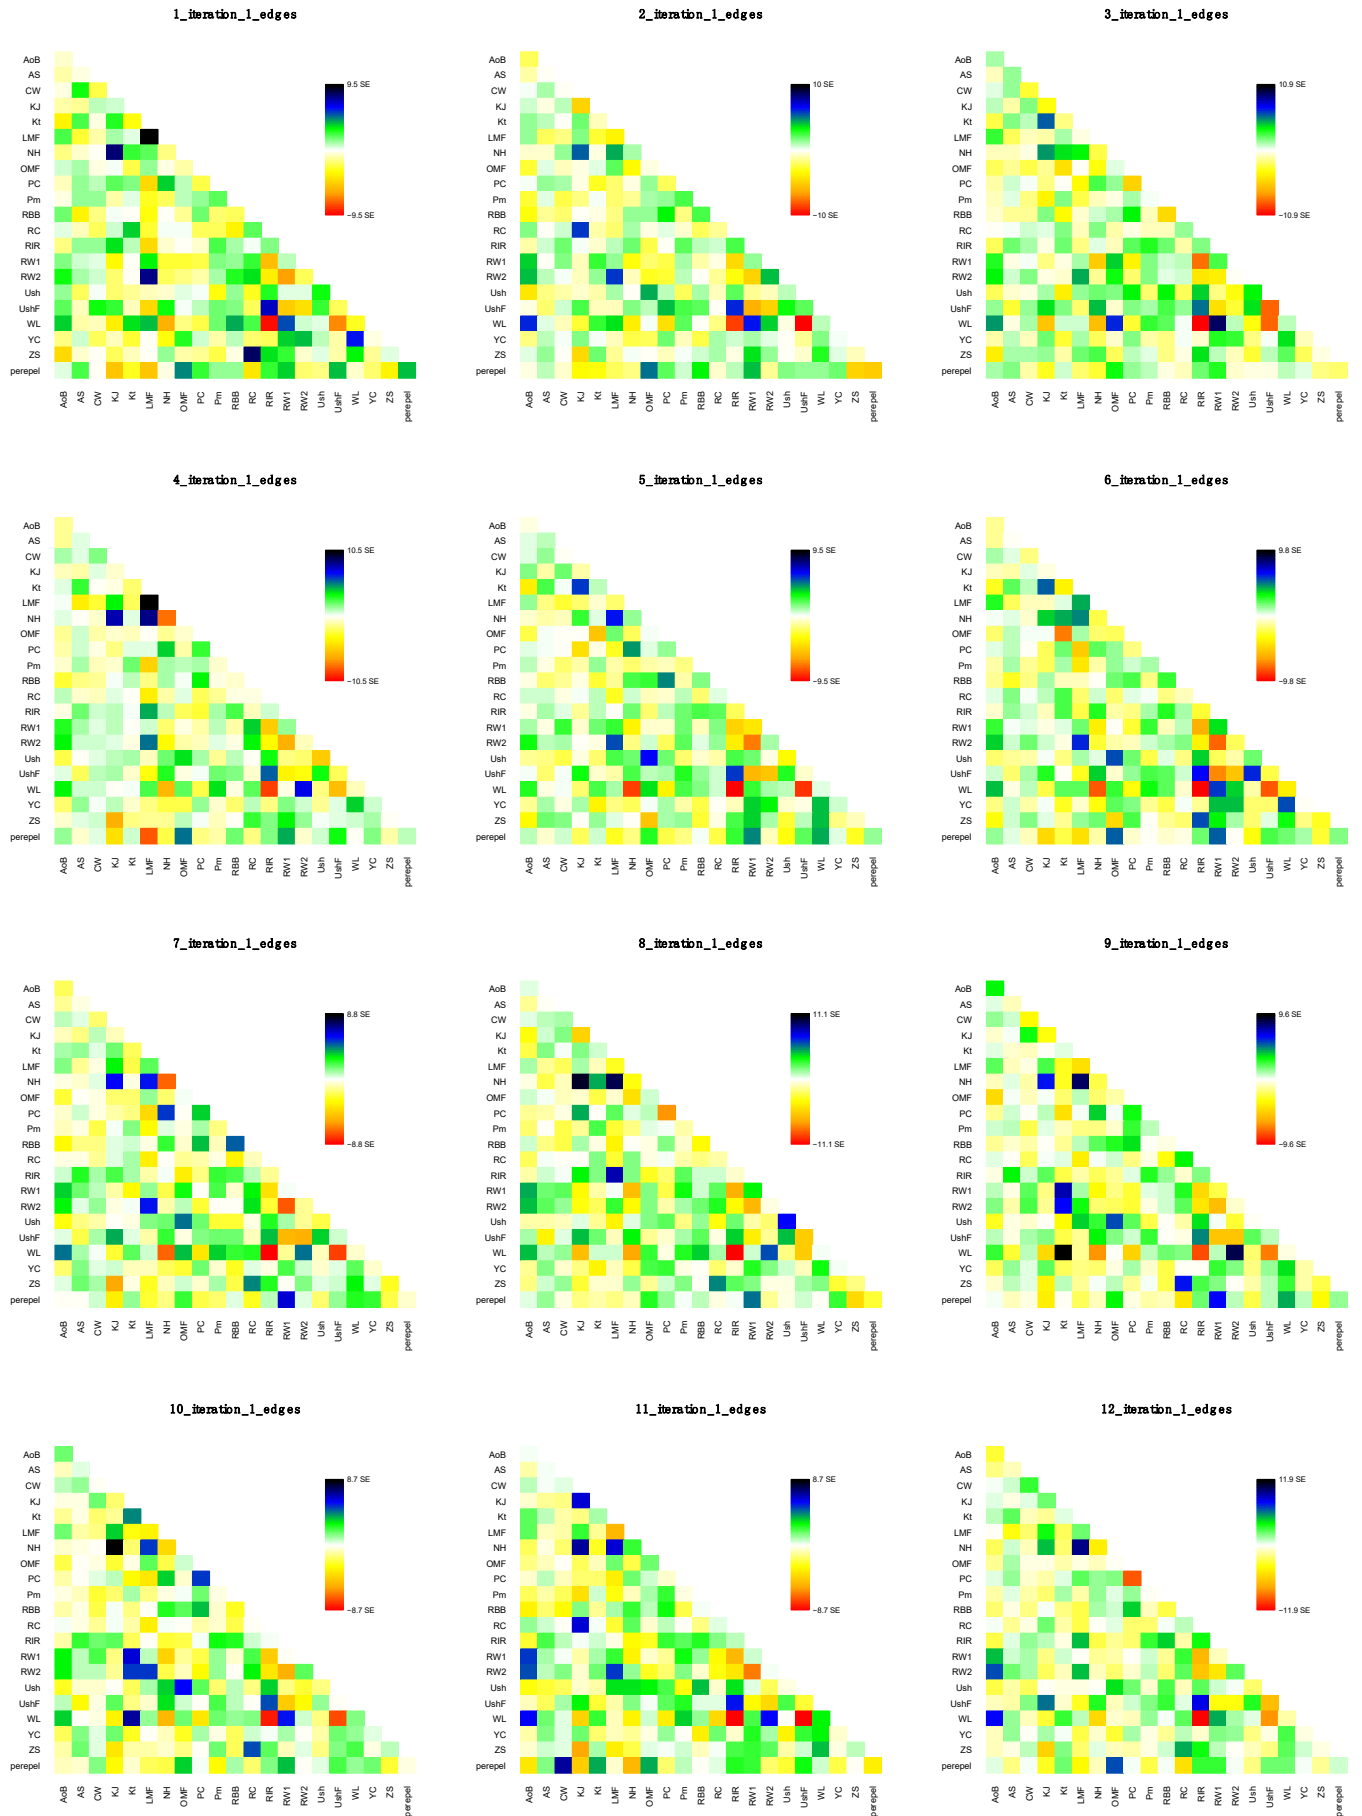

13\_iteration\_1\_edges

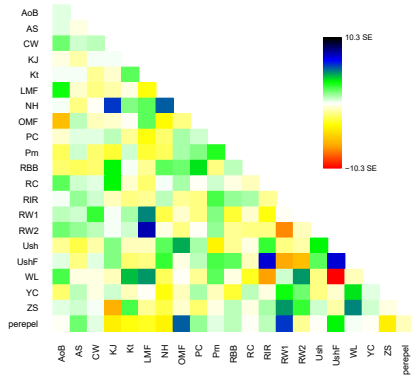

14\_iteration\_1\_edges

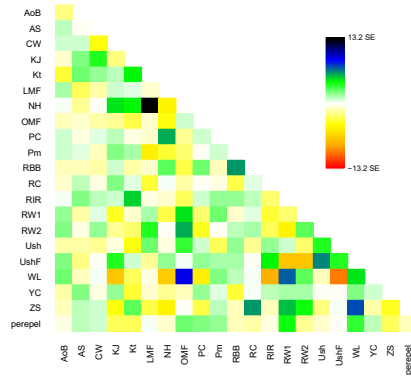

15\_iteration\_1\_edges

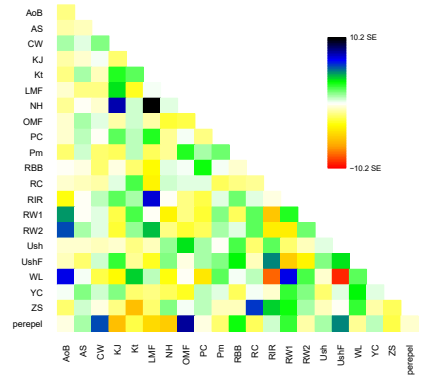

16\_iteration\_1\_edges

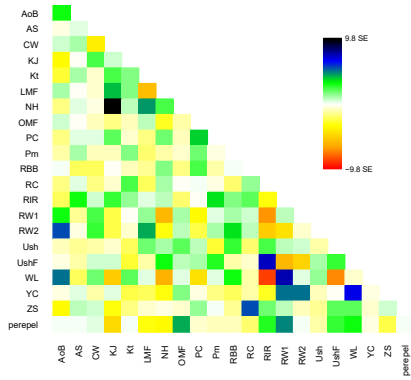

17\_iteration\_1\_edges

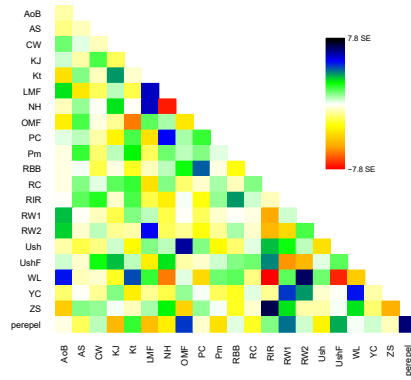

18\_iteration\_1\_edges

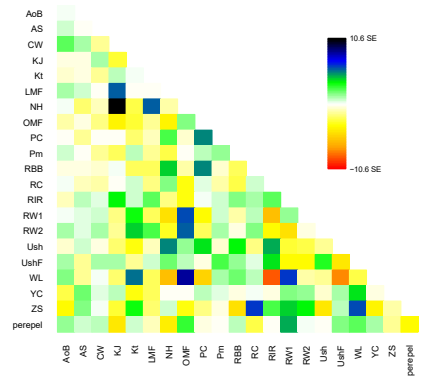

19\_iteration\_1\_edges

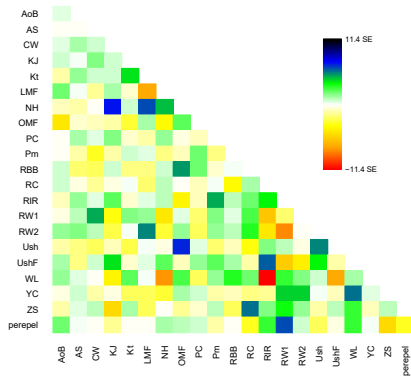

20\_iteration\_1\_edges

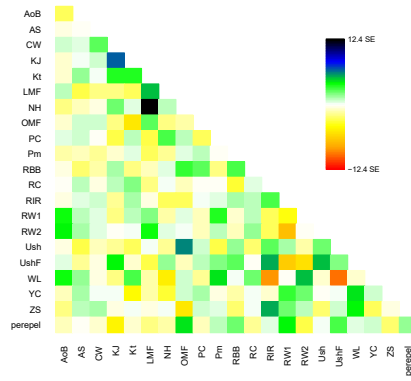

21\_iteration\_1\_edges

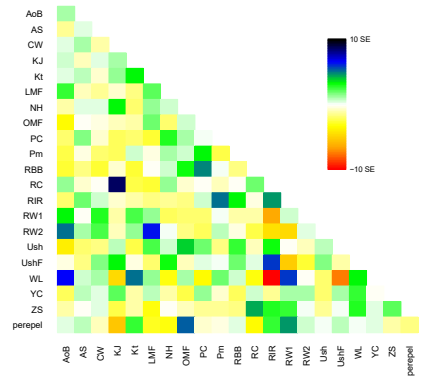

22\_iteration\_1\_edges

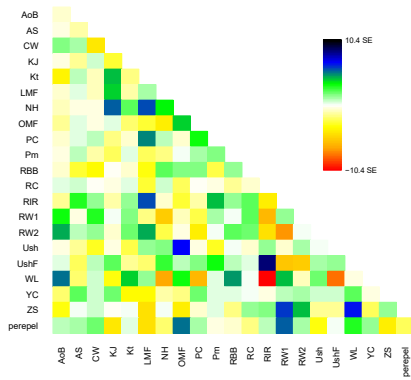

23\_iteration\_1\_edges

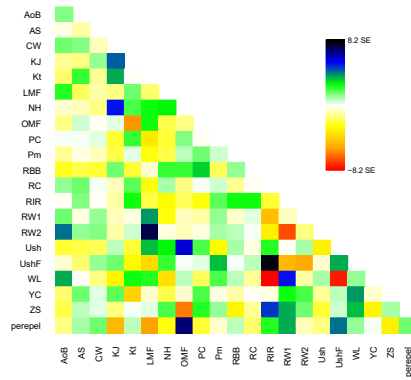

24\_iteration\_1\_edges

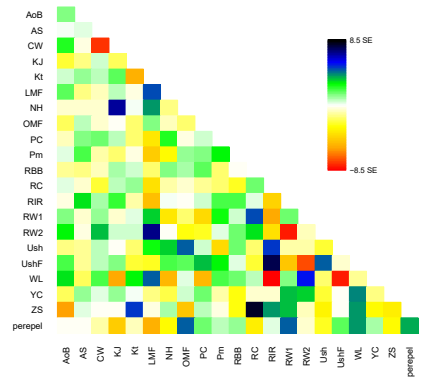



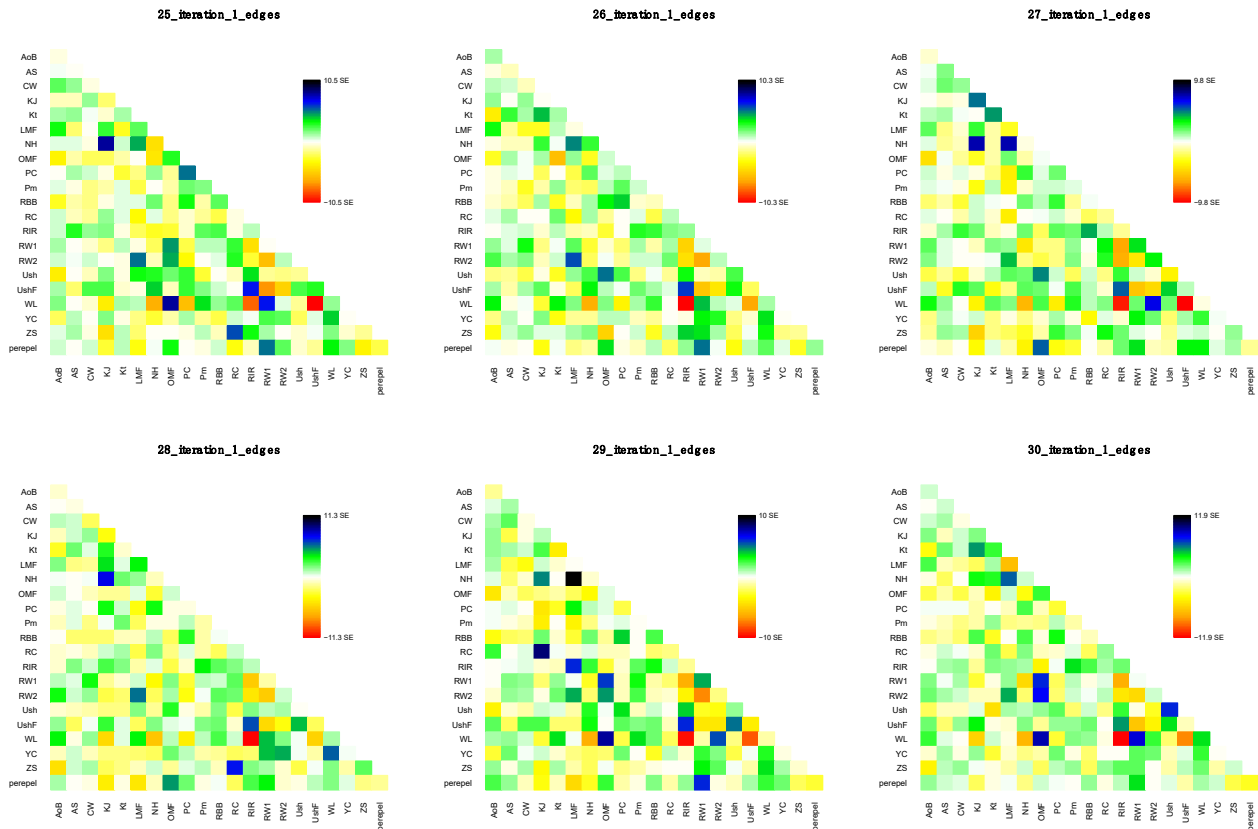

**Supplementary Figure S10C.** Assessment of the degree of divergence and the level of gene flow between the studied breeds. Residual matrix derived from the TreeMix analysis for a single migration event, expressed as the number of standard error deviations for the observations in the respective breeds. Breed codes: AoB, Australorp Black; AS, Adler Silver; CW, Cornish White; KJ, Kuchino Jubilee; Kt, Kotlyarevsky; LMF, Leningrad Mille Fleur; NH, New Hampshire; OMF, Orloff Mille Fleur; PC, Poltava Clay; Pm, Pervomai; RBB, Russian Black Bearded; RC, Russian Crested; RIR, Rhode Island Red; RW1, Russian White (ARPTI); RW2, Russian White (RRIFAGB); Ush, Ushanka; UshF, Ushanka Foot-feathered; WL, White Leghorn; YC, Yurlov Crower; ZS, Zagorsk Salmon. Outgroup: perepel, quail (*C. coturnix*).

D

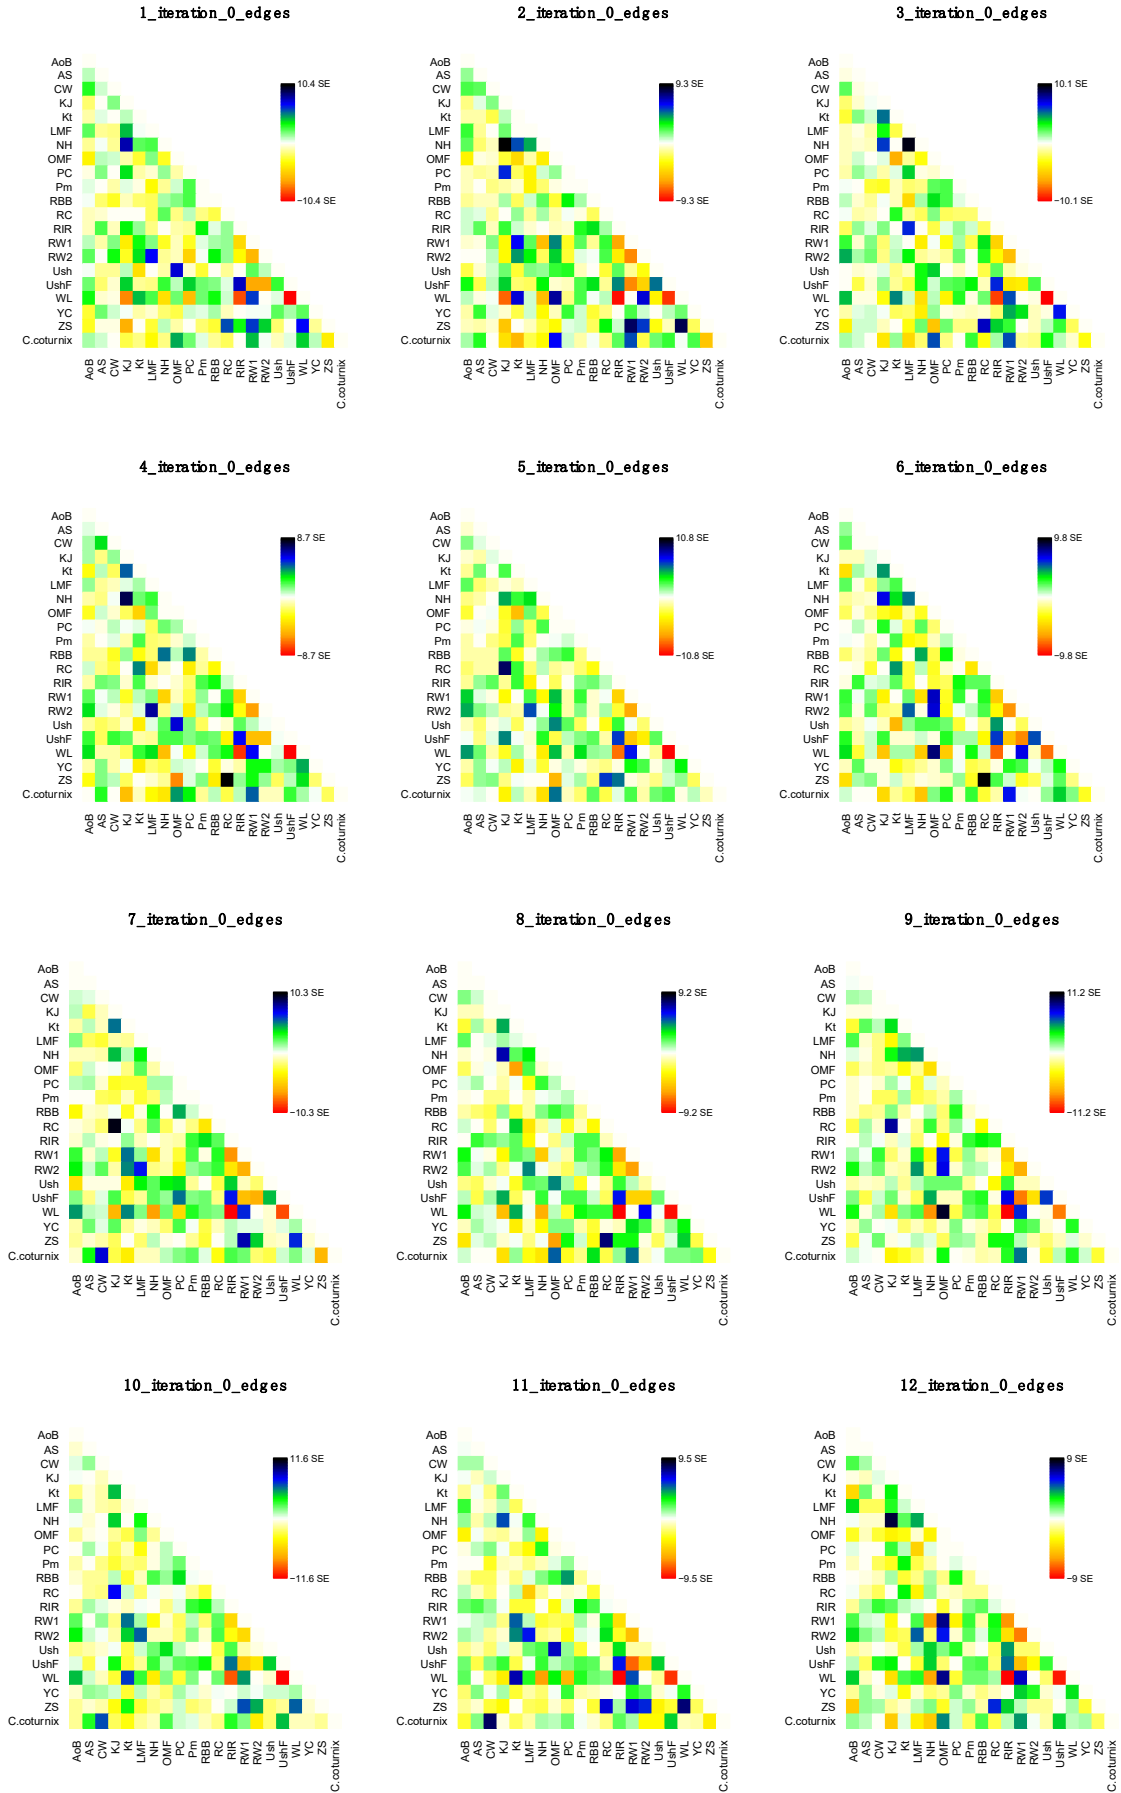

13\_iteration\_0\_edges

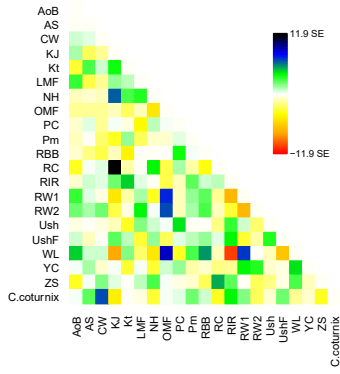

14\_iteration\_0\_edges

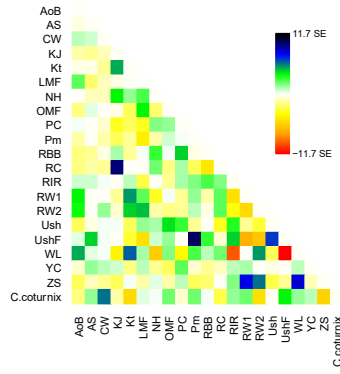

15\_iteration\_0\_edges

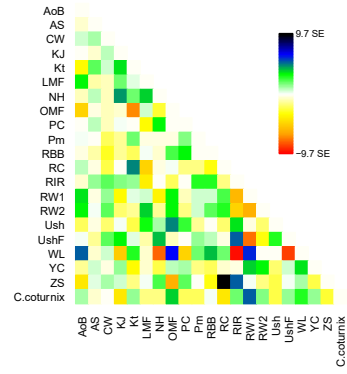

16\_iteration\_0\_edges

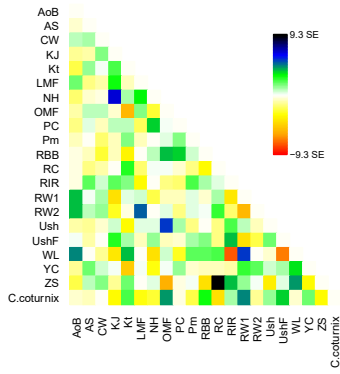

17\_iteration\_0\_edges

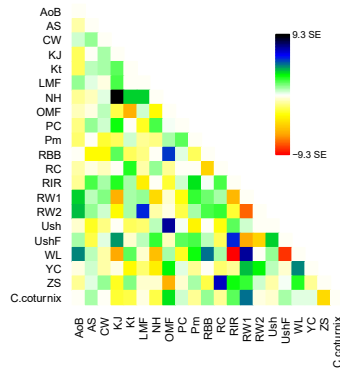

18\_iteration\_0\_edges

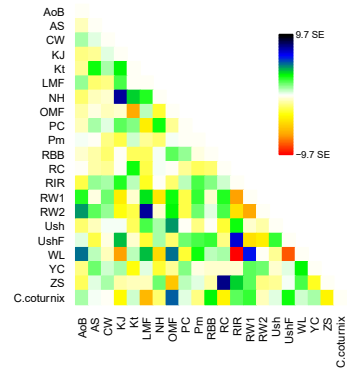

19\_iteration\_0\_edges

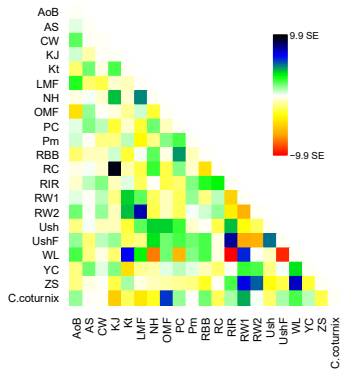

20\_iteration\_0\_edges

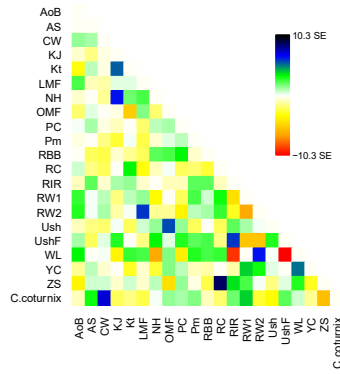

21\_iteration\_0\_edges

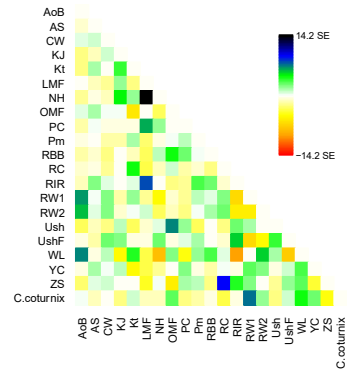

22\_iteration\_0\_edges

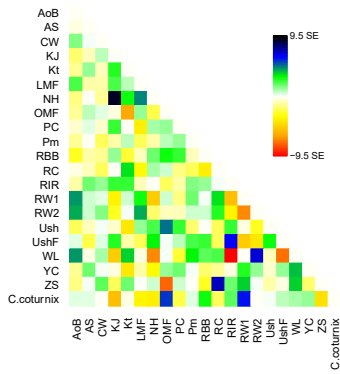

23\_iteration\_0\_edges

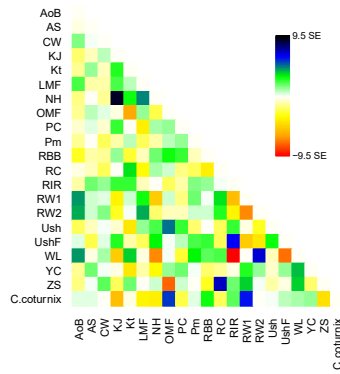

24\_iteration\_0\_edges

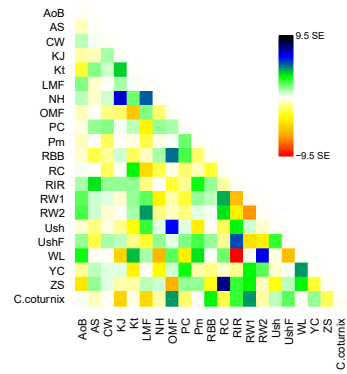

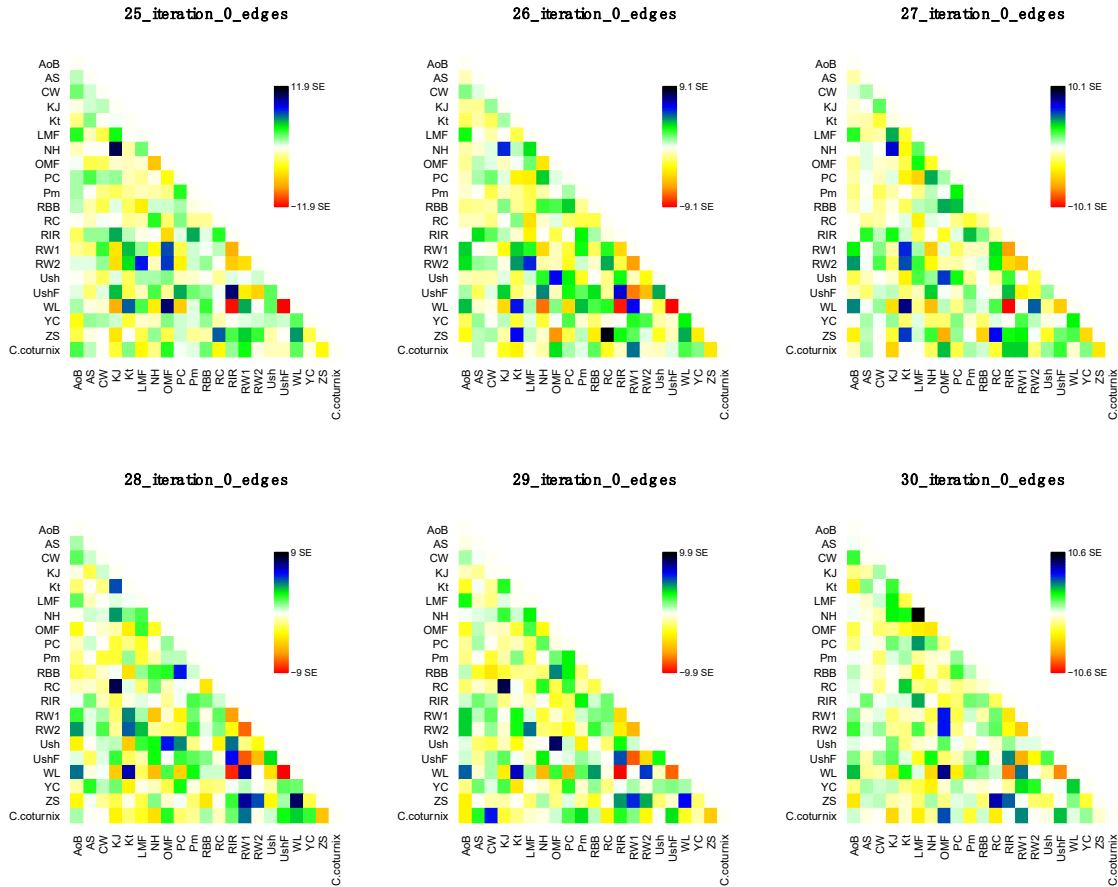

**Supplementary Figure S10D.** Same as Supplementary Figure S10C, except for no migration events. Breed codes: AoB, Australorp Black; AS, Adler Silver; CW, Cornish White; KJ, Kuchino Jubilee; Kt, Kotlyarevsky; LMF, Leningrad Mille Fleur; NH, New Hampshire; OMF, Orloff Mille Fleur; PC, Poltava Clay; Pm, Pervomai; RBB, Russian Black Bearded; RC, Russian Crested; RIR, Rhode Island Red; RW1, Russian White (ARPTI); RW2, Russian White (RRIFAGB); Ush, Ushanka; UshF, Ushanka Foot-feathered; WL, White Leghorn; YC, Yurlov Crower; ZS, Zagorsk Salmon. Outgroup: *C. coturnix*, quail.

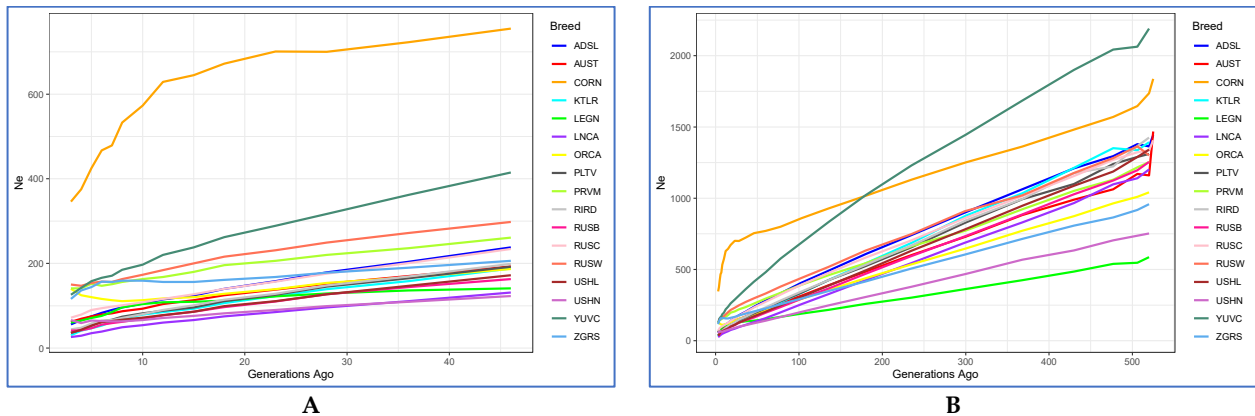

**Supplementary Figure S11.** Dynamics of changes in the effective population size ( $N_e$ ). This was plotted using the *SNeP* program [78] for the 17 studied breeds (except KJ and NH) in the interval of 3–46 (A) and 3–525 (B) generations ago. Breed abbreviations: ADSL, Adler Silver; AUST, Australorp Black; CORN, Cornish White; KTLR, Kotlyarevsky; LEGN, White Leghorn; LNCA, Leningrad Mille Fleur; ORCA, Orloff Mille Fleur; PLTV, Poltava Clay; PRVM, Pervomai; RIRD, Rhode Island Red; RUSB, Russian Black Bearded; RUSC, Russian Crested; RUSW, Russian White; USHL, Ushanka Foot-feathered; USHN, Ushanka; YUVC, Yurlov Crower; ZGRS, Zagorsk Salmon.

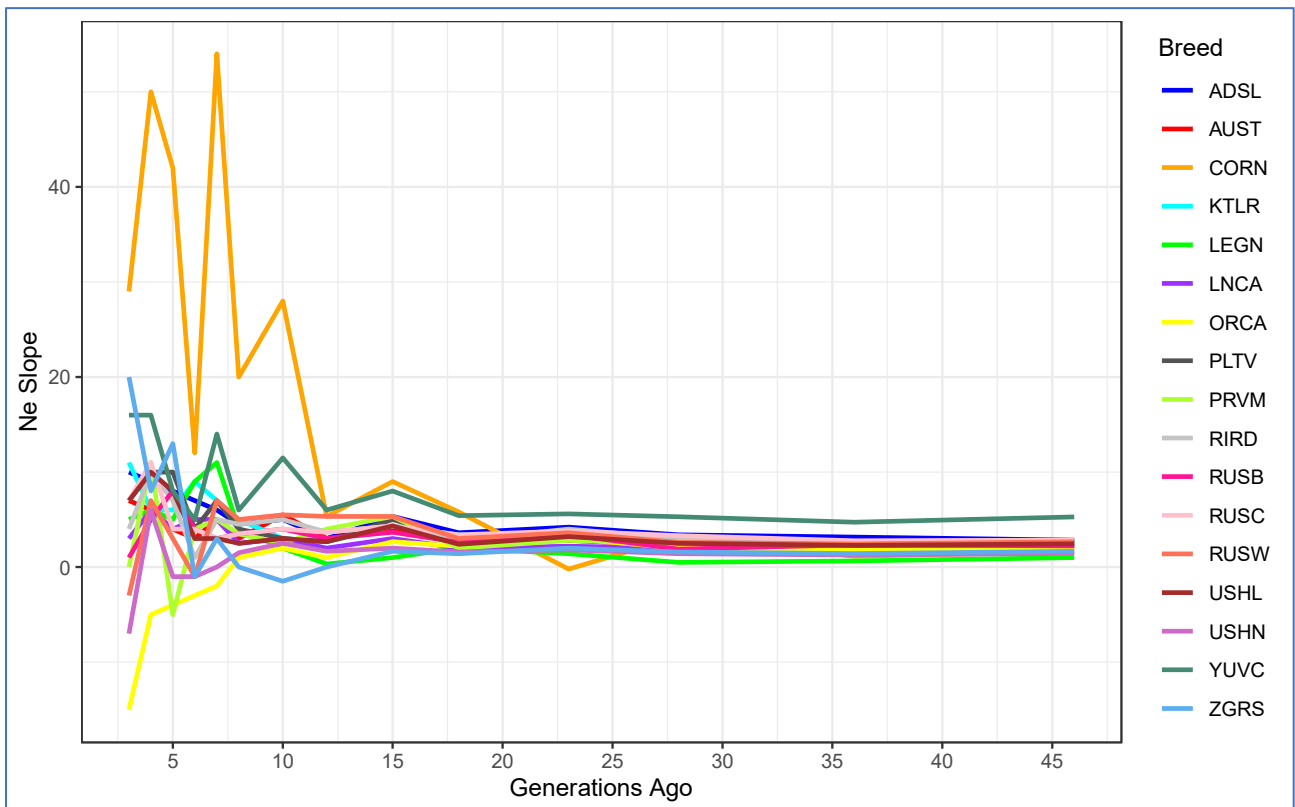

**Supplementary Figure S12.** Analysis of the  $N_e$  slopes [83]. These exhibit  $N_e$  changes in the 17 studied breeds (except KJ and NH) over a period of 3–46 generations ago. The constant rate of change is shown as a horizontal straight line at point 0 on the  $y$ -axis, while deviations above and below 0 represent, respectively, the relative increase and decrease in the changing  $N_e$  slope as compared to the previous generation. Breed abbreviations: ADSL, Adler Silver; AUST, Australorp Black; CORN, Cornish White; KTLR, Kotlyarevsky; LEGN, White Leghorn; LNCA, Leningrad Mille Fleur; ORCA, Orloff Mille Fleur; PLTV, Poltava Clay; PRVM, Pervomai; RIRD, Rhode Island Red; RUSB, Russian Black Bearded; RUSC, Russian Crested; RUSW, Russian White; USHL, Ushanka Foot-feathered; USHN, Ushanka; YUVC, Yurlov Crower; ZGRS, Zagorsk Salmon.

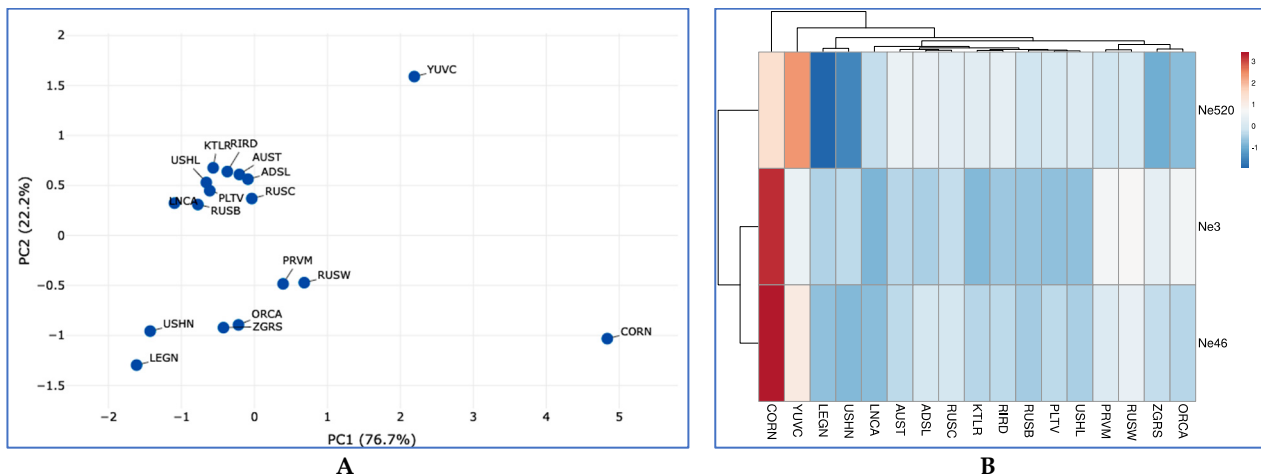

**Supplementary Figure S13.** Distribution of the 17 studied breeds (except KJ and NH) when combining the  $N_e$  data for 3, 46, and 520–525 generations ago. **(A)** PCA plot built using the Phantasus program [56]. Unit variance scaling is applied to the rows of the original matrix; multilevel singular value decomposition (SVD) with imputation was used to calculate the principal components (PCs). The axes  $x$  and  $y$  show PC1 and PC2 that account for 76.7 and 22.2% of the total variance, respectively. **(B)** Heat map and trees obtained using the ClustVis program [64] and Euclidean distances for both rows and columns of the matrix (with the *average* option selected for the clustering method). Breed abbreviations: ADSL, Adler Silver; AUST, Australorp Black; CORN, Cornish White; KTLR, Kotlyarevsky; LEGN, White Leghorn; LNCA, Leningrad Mille Fleur; ORCA, Orloff Mille Fleur; PLTV, Poltava Clay; PRVM, Pervomai; RIRD, Rhode Island Red; RUSB, Russian Black Bearded; RUSC, Russian Crested; RUSW, Russian White; USHL, Ushanka Foot-feathered; USHN, Ushanka; YUVC, Yurlov Crower; ZGRS, Zagorsk Salmon.

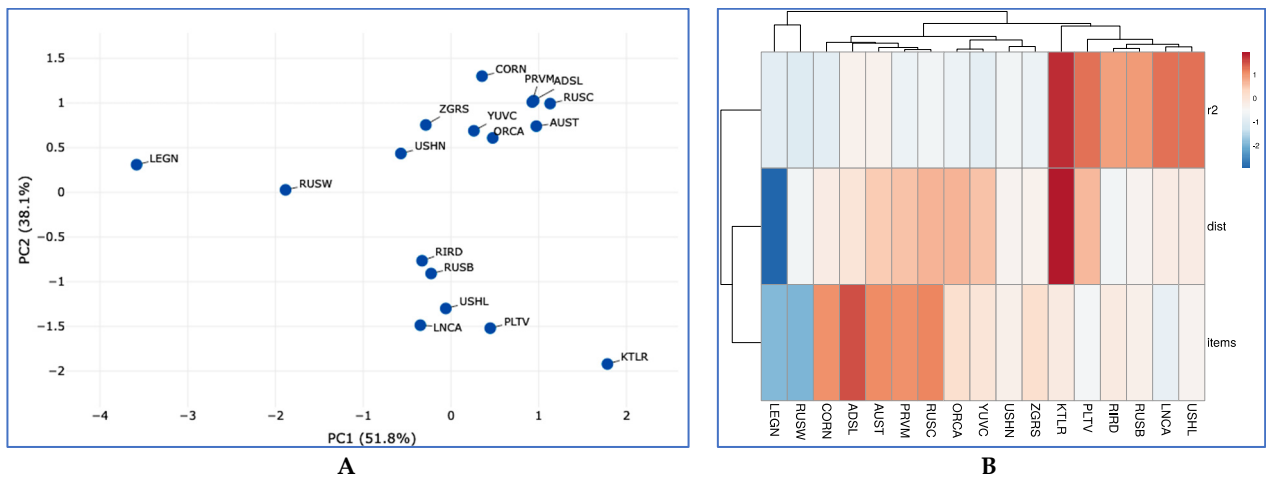

**Supplementary Figure S14.** Distribution of the 17 studied breeds (except KJ and NH) when combining the  $r^2$ ,  $dist$  and  $items$  data for 3 generations ago. (A) PCA plot built using the Phantasus program [56]. Unit variance scaling is applied to the rows of the original matrix; multilevel singular value decomposition (SVD) with imputation was used to calculate the principal components (PCs). The axes  $x$  and  $y$  show PC1 and PC2 that account for 51.8 and 38.1% of the total variance, respectively. (B) Heat map and trees obtained using the ClustVis program [64] and Euclidean distances for both rows and columns of the matrix (with the *average* option selected for the clustering method). Breed abbreviations: ADSL, Adler Silver; AUST, Australorp Black; CORN, Cornish White; KTLR, Kotlyarevsky; LEGN, White Leghorn; LNCA, Leningrad Mille Fleur; ORCA, Orloff Mille Fleur; PLTV, Poltava Clay; PRVM, Pervomai; RIRD, Rhode Island Red; RUSB, Russian Black Bearded; RUSC, Russian Crested; RUSW, Russian White; USHL, Ushanka Foot-feathered; USHN, Ushanka; YUVC, Yurlov Crower; ZGRS, Zagorsk Salmon.

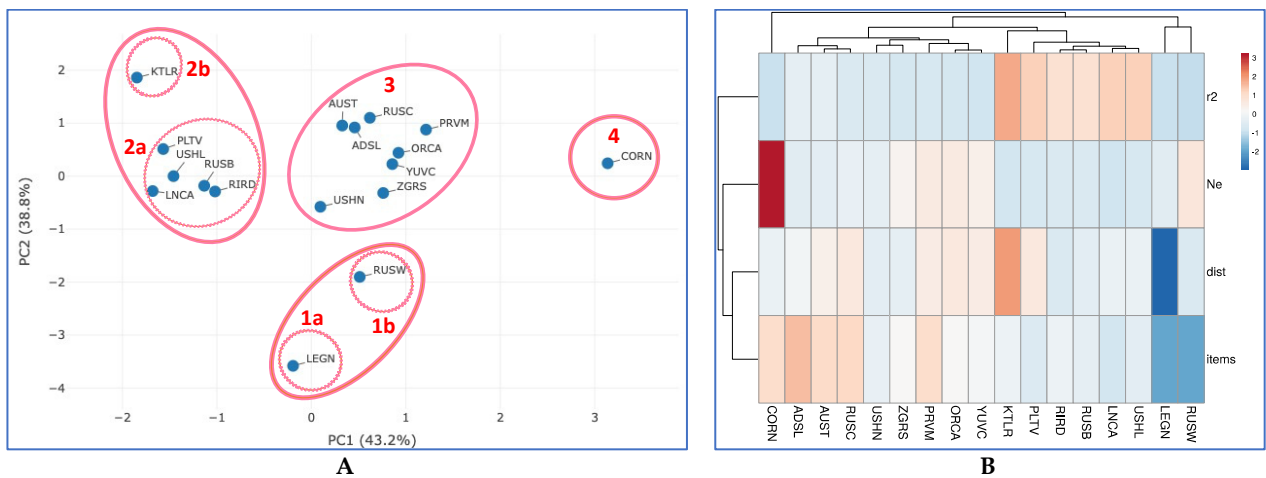

**Supplementary Figure S15.** Distribution of the 17 studied breeds (except KJ and NH) when combining the  $Ne$ ,  $r^2$ ,  $dist$  and  $items$  data for 3 generations ago. (A) PCA plot built using the Phantasus program [56]. Unit variance scaling is applied to the rows of the original matrix; multilevel singular value decomposition (SVD) with imputation was used to calculate the principal components (PCs). The axes  $x$  and  $y$  show PC1 and PC2 that account for 43.2 and 38.8% of the total variance, respectively.  $N = 17$  data points (breeds). (B) Heat map and trees obtained using the ClustVis program [64] and Euclidean distances for both rows and columns of the matrix (with the *average* option selected for the clustering method). Breed abbreviations: ADSL, Adler Silver; AUST, Australorp Black; CORN, Cornish White; KTLR, Kotlyarevsky; LEGN, White Leghorn; LNCA, Leningrad Mille Fleur; ORCA, Orloff Mille Fleur; PLTV, Poltava Clay; PRVM, Pervomai; RIRD, Rhode Island Red; RUSB, Russian Black Bearded; RUSC, Russian Crested; RUSW, Russian White; USHL, Ushanka Foot-feathered; USHN, Ushanka; YUVC, Yurlov Crower; ZGRS, Zagorsk Salmon.
