# Supplementary material for: Whole Genome Screening Procures a Holistic Hold of the Russian Chicken Gene Pool Heritage and Demographic History
Source: MDPI journal article supplement (doi:10.3390/biology12070979), 2023-07-10
Supplement: s1 [file s1 › Suppl Table S1 edited.xlsx]

## Sheet: Grouped
Supplementary Table S1. Statistics for diversity and runs of homozygosity (ROHs) when grouping breeds by origin.
Breed group	n	HO (M ± SE)	HE (M ± SE)	UHE (M ± SE)	AR (M ± SE)	FIS [CI 95%]	UFIS [CI 95%]	ROH Length. Mb (M ± SE)	ROH No. (M ± SE)	FROH (M ± SE)
Old Russian (ORBs)	170	0.297±0	0.391±0.001	0.393±0.001	2.000±0	0.236[0.235;0.237]	0.238[0.237;0.239]	252.50±9.44	124.51±3.42	0.265±0.010
Improved Russian (IRBs)	257	0.272±0	0.384±0.001	0.385±0.001	2.000±0	0.285[0.284;0.286]	0.286[0.285;0.287]	308.42±6.42	136.46±2.37	0.323±0.007
Specialized foreign (SFBs)	101	0.292±0.001	0.382±0.001	0.384±0.001	1.998±0	0.227[0.225;0.229]	0.231[0.229;0.233]	272.54±9.06	123.10±2.85	0.286±0.010
Student’s t-test
ORBs – IRBs	170	p < 0.001	p < 0.001	p < 0.001	n.s.			p < 0.001	p < 0.01	p < 0.001
ORBs – SFBs	257	p < 0.001	p < 0.001	p < 0.001	p < 0.001			n.s.	n.s.	n.s.
IRBs – SFBs	101	p < 0.001	n.s.	n.s.	p < 0.001			p < 0.01	p < 0.01	p < 0.01
n.s., not significant

## Sheet: ORBs
Breeds grouped: OMF. PC. RBB. RC. Ush. YC				N = 170
HO (M ± SE)	HE (M ± SE)	UHE (M ± SE)	AR (M ± SE)	FIS [CI 95%]	UFIS [CI 95%]	ROH Length. Mb (M ± SE)	ROH No. (M ± SE)	FROH (M ± SE)
0.297±0	0.391±0.001	0.393±0.001	2.000±0	0.236[0.235;0.237]	0.238[0.237;0.239]	252.50±9.44	124.51±3.42	0.265±0.010

## Sheet: IRBs
Breeds grouped: AS. KJ. Kt. LMF. Pm. RW1. RW2. UshF. ZS					N = 257
HO (M ± SE)	HE (M ± SE)	UHE (M ± SE)	AR (M ± SE)	FIS [CI 95%]	UFIS [CI 95%]	ROH Length. Mb (M ± SE)	ROH No. (M ± SE)	FROH (M ± SE)
0.272±0	0.384±0.001	0.385±0.001	2.000±0	0.285[0.284;0.286]	0.286[0.285;0.287]	308.42±6.42	136.46±2.37	0.323±0.007

## Sheet: SFBs
Breeds grouped: AoB. CW. NH. RIR. WL			N = 101
HO (M ± SE)	HE (M ± SE)	UHE (M ± SE)	AR (M ± SE)	FIS [CI 95%]	UFIS [CI 95%]	ROH Length. Mb (M ± SE)	ROH No. (M ± SE)	FROH (M ± SE)
0.292±0.001	0.382±0.001	0.384±0.001	1.998±0	0.227[0.225;0.229]	0.231[0.229;0.233]	272.54±9.06	123.10±2.85	0.286±0.010
