# Supplementary material for: Whole Genome Screening Procures a Holistic Hold of the Russian Chicken Gene Pool Heritage and Demographic History
Source: MDPI journal article supplement (doi:10.3390/biology12070979), 2023-07-10
Supplement: s1 [file s1 › Suppl Table S2 edited.xls]

## Sheet: Sheet1
Supplementary Table S2: Pairwise FST-based interbreed genetic distances.
Breeds	AoB	AS	CW	KJ	Kt	LMF	NH	OMF	PC	Pm	RBB	RC	RIR	RW1	RW2	Ush	UshF	WL	YC	ZS
AoB	-
AS	0.187	-
CW	0.187	0.164	-
KJ	0.277	0.26	0.26	-
Kt	0.274	0.253	0.261	0.34	-
LMF	0.265	0.249	0.247	0.358	0.363	-
NH	0.307	0.285	0.283	0.375	0.389	0.391	-
OMF	0.243	0.228	0.227	0.323	0.316	0.319	0.359	-
PC	0.28	0.255	0.258	0.35	0.355	0.356	0.371	0.322	-
Pm	0.237	0.159	0.218	0.31	0.304	0.308	0.34	0.275	0.304	-
RBB	0.277	0.268	0.267	0.358	0.359	0.372	0.399	0.309	0.356	0.314	-
RC	0.176	0.163	0.171	0.226	0.242	0.251	0.28	0.224	0.254	0.213	0.263	-
RIR	0.269	0.24	0.243	0.338	0.343	0.336	0.315	0.316	0.328	0.29	0.351	0.242	-
RW1	0.284	0.279	0.281	0.378	0.352	0.381	0.422	0.314	0.381	0.324	0.371	0.269	0.382	-
RW2	0.215	0.216	0.224	0.301	0.279	0.283	0.33	0.243	0.303	0.257	0.291	0.204	0.303	0.22	-
Ush	0.274	0.262	0.263	0.349	0.351	0.357	0.386	0.296	0.351	0.31	0.286	0.255	0.337	0.367	0.292	-
UshF	0.267	0.233	0.236	0.357	0.362	0.377	0.416	0.318	0.362	0.284	0.364	0.248	0.339	0.398	0.308	0.348	-
WL	0.355	0.352	0.353	0.459	0.43	0.482	0.525	0.385	0.466	0.398	0.448	0.342	0.474	0.36	0.255	0.443	0.506	-
YC	0.144	0.127	0.137	0.216	0.22	0.21	0.248	0.181	0.217	0.177	0.219	0.125	0.209	0.226	0.167	0.212	0.206	0.293	-
ZS	0.256	0.235	0.24	0.335	0.311	0.338	0.368	0.293	0.333	0.285	0.335	0.204	0.319	0.328	0.257	0.331	0.338	0.408	0.199	-
Note. P-values of pairwise FST- based interbreed genetic distances equaled zero.

## Sheet: Sheet2
20
AoB	0	0.187	0.187	0.277	0.274	0.265	0.307	0.243	0.28	0.237	0.277	0.176	0.269	0.284	0.215	0.274	0.267	0.355	0.144	0.256		4.774	0.2387
AS	0.187	0	0.164	0.26	0.253	0.249	0.285	0.228	0.255	0.159	0.268	0.163	0.24	0.279	0.216	0.262	0.233	0.352	0.127	0.235		4.415	0.22075
CW	0.187	0.164	0	0.26	0.261	0.247	0.283	0.227	0.258	0.218	0.267	0.171	0.243	0.281	0.224	0.263	0.236	0.353	0.137	0.24		4.52	0.226
KJ	0.277	0.26	0.26	0	0.34	0.358	0.375	0.323	0.35	0.31	0.358	0.226	0.338	0.378	0.301	0.349	0.357	0.459	0.216	0.335		6.17	0.3085
Kt	0.274	0.253	0.261	0.34	0	0.363	0.389	0.316	0.355	0.304	0.359	0.242	0.343	0.352	0.279	0.351	0.362	0.43	0.22	0.311		6.104	0.3052
LMF	0.265	0.249	0.247	0.358	0.363	0	0.391	0.319	0.356	0.308	0.372	0.251	0.336	0.381	0.283	0.357	0.377	0.482	0.21	0.338		6.243	0.31215
NH	0.307	0.285	0.283	0.375	0.389	0.391	0	0.359	0.371	0.34	0.399	0.28	0.315	0.422	0.33	0.386	0.416	0.525	0.248	0.368		6.789	0.33945
OMF	0.243	0.228	0.227	0.323	0.316	0.319	0.359	0	0.322	0.275	0.309	0.224	0.316	0.314	0.243	0.296	0.318	0.385	0.181	0.293		5.491	0.27455
PC	0.28	0.255	0.258	0.35	0.355	0.356	0.371	0.322	0	0.304	0.356	0.254	0.328	0.381	0.303	0.351	0.362	0.466	0.217	0.333		6.202	0.3101
Pm	0.237	0.159	0.218	0.31	0.304	0.308	0.34	0.275	0.304	0	0.314	0.213	0.29	0.324	0.257	0.31	0.284	0.398	0.177	0.285		5.307	0.26535
RBB	0.277	0.268	0.267	0.358	0.359	0.372	0.399	0.309	0.356	0.314	0	0.263	0.351	0.371	0.291	0.286	0.364	0.448	0.219	0.335		6.207	0.31035
RC	0.176	0.163	0.171	0.226	0.242	0.251	0.28	0.224	0.254	0.213	0.263	0	0.242	0.269	0.204	0.255	0.248	0.342	0.125	0.204		4.352	0.2176
RIR	0.269	0.24	0.243	0.338	0.343	0.336	0.315	0.316	0.328	0.29	0.351	0.242	0	0.382	0.303	0.337	0.339	0.474	0.209	0.319		5.974	0.2987
RW1	0.284	0.279	0.281	0.378	0.352	0.381	0.422	0.314	0.381	0.324	0.371	0.269	0.382	0	0.22	0.367	0.398	0.36	0.226	0.328		6.317	0.31585
RW2	0.215	0.216	0.224	0.301	0.279	0.283	0.33	0.243	0.303	0.257	0.291	0.204	0.303	0.22	0	0.292	0.308	0.255	0.167	0.257		4.948	0.2474
Ush	0.274	0.262	0.263	0.349	0.351	0.357	0.386	0.296	0.351	0.31	0.286	0.255	0.337	0.367	0.292	0	0.348	0.443	0.212	0.331		6.07	0.3035
UshF	0.267	0.233	0.236	0.357	0.362	0.377	0.416	0.318	0.362	0.284	0.364	0.248	0.339	0.398	0.308	0.348	0	0.506	0.206	0.338		6.267	0.31335
WL	0.355	0.352	0.353	0.459	0.43	0.482	0.525	0.385	0.466	0.398	0.448	0.342	0.474	0.36	0.255	0.443	0.506	0	0.293	0.408		7.734	0.3867
YC	0.144	0.127	0.137	0.216	0.22	0.21	0.248	0.181	0.217	0.177	0.219	0.125	0.209	0.226	0.167	0.212	0.206	0.293	0	0.199		3.733	0.18665
ZS	0.256	0.235	0.24	0.335	0.311	0.338	0.368	0.293	0.333	0.285	0.335	0.204	0.319	0.328	0.257	0.331	0.338	0.408	0.199	0		5.713	0.28565
1	YC	3.733	0.18665
1	RC	4.352	0.2176
1	OMF	5.491	0.27455
1	Ush	6.07	0.3035
1	PC	6.202	0.3101
1	RBB	6.207	0.31035
			0.267125
2	AS	4.415	0.22075
2	RW2	4.948	0.2474
2	Pm	5.307	0.26535
2	ZS	5.713	0.28565
2	Kt	6.104	0.3052
2	KJ	6.17	0.3085
2	LMF	6.243	0.31215
2	UshF	6.267	0.31335
2	RW1	6.317	0.31585
			0.286022
3	CW	4.52	0.226
3	AoB	4.774	0.2387
3	RIR	5.974	0.2987
3	NH	6.789	0.33945
3	WL	7.734	0.3867
			0.29791
