# Supplementary material for: Whole Genome Screening Procures a Holistic Hold of the Russian Chicken Gene Pool Heritage and Demographic History
Source: MDPI journal article supplement (doi:10.3390/biology12070979), 2023-07-10
Supplement: s1 [file s1 › Suppl Table S4.xls]

## Sheet: Sheet 1
Supplementary Table S4: Effective population size changes over recent 50–500 generations.
Breed	Ne_50
	3	4	5	6	7	8	10	12	15	18	23	28	36	46
AoB	52	63	74	78	83	88	95	105	115	127	142	155	176	203
AS	87	95	106	113	120	126	133	143	155	174	194	214	241	273
CW	321	347	409	457	474	530	571	633	660	688	719	732	766	803
KJ	246	228	205	179	169	160	157	155	155	154	159	164	175	185
Kt	121	139	129	121	125	130	134	133	134	136	142	146	155	167
LMF	35	37	41	46	50	56	62	67	75	87	98	109	127	148
NH	43	42	41	43	47	49	52	57	61	68	76	86	99	115
OMF	173	167	173	163	153	145	140	142	144	148	155	168	180	199
PC	81	78	81	83	83	83	86	91	97	104	111	120	133	148
Pm	157	172	172	166	167	170	172	172	180	192	199	209	221	243
RBB	70	72	75	75	75	76	79	81	85	89	95	102	110	120
RC	103	114	128	133	137	139	147	157	168	184	204	226	255	290
RIR	81	88	95	99	101	107	114	121	130	136	140	148	160	176
RW1	93	100	96	93	99	101	104	107	111	117	125	131	142	156
RW2	261	245	233	228	224	218	218	225	236	248	257	272	294	317
Ush	63	66	70	69	69	71	75	81	86	91	101	111	124	138
UshF	29	36	44	51	55	58	64	72	80	92	106	124	146	175
WL	80	84	89	94	106	117	129	133	132	136	146	153	160	164
YC	141	159	182	192	205	218	233	255	276	301	329	363	408	462
ZS	179	210	200	213	208	210	198	191	186	185	189	197	205	217
Breed	Ne_500
	3	4	5	6	7	8	10	12	15	18	23	28	36	46	60	78	103	136	180	235	300	368	430	477	506	520
AoB	52	63	74	78	83	88	95	105	115	127	142	155	176	203	236	274	327	401	494	616	745	878	998	1072	1155	1174
AS	87	95	106	113	120	126	133	143	155	174	194	214	241	273	318	373	446	535	655	793	959	1115	1263	1356	1426	1447
CW	321	347	409	457	474	530	571	633	660	688	719	732	766	803	825	853	914	990	1084	1210	1327	1451	1568	1671	1715	1814
KJ	246	228	205	179	169	160	157	155	155	154	159	164	175	185	201	225	262	308	374	443	540	627	744	792	819	826
Kt	121	139	129	121	125	130	134	133	134	136	142	146	155	167	182	205	235	277	333	409	497	592	672	724	765	753
LMF	35	37	41	46	50	56	62	67	75	87	98	109	127	148	179	221	280	359	463	593	750	899	1039	1168	1250	1297
NH	43	42	41	43	47	49	52	57	61	68	76	86	99	115	136	164	209	267	345	444	550	673	814	881	970	960
OMF	173	167	173	163	153	145	140	142	144	148	155	168	180	199	221	253	299	362	434	527	633	754	844	947	979	1012
PC	81	78	81	83	83	83	86	91	97	104	111	120	133	148	167	194	231	276	335	410	497	589	658	742	765	803
Pm	157	172	172	166	167	170	172	172	180	192	199	209	221	243	269	306	356	415	492	594	687	816	926	994	1061	1101
RBB	70	72	75	75	75	76	79	81	85	89	95	102	110	120	138	160	195	235	291	367	447	533	609	677	714	742
RC	103	114	128	133	137	139	147	157	168	184	204	226	255	290	335	393	472	564	681	819	993	1152	1320	1446	1517	1508
RIR	81	88	95	99	101	107	114	121	130	136	140	148	160	176	198	230	269	324	393	480	586	692	802	862	895	960
RW1	93	100	96	93	99	101	104	107	111	117	125	131	142	156	176	201	237	286	348	428	515	602	685	734	784	840
RW2	261	245	233	228	224	218	218	225	236	248	257	272	294	317	345	388	446	523	622	737	877	998	1117	1210	1286	1270
Ush	63	66	70	69	69	71	75	81	86	91	101	111	124	138	157	184	220	268	329	404	504	606	688	765	791	810
UshF	29	36	44	51	55	58	64	72	80	92	106	124	146	175	210	258	320	407	516	669	834	1010	1181	1262	1391	1410
WL	80	84	89	94	106	117	129	133	132	136	146	153	160	164	175	196	222	253	305	360	432	501	583	630	652	694
YC	141	159	182	192	205	218	233	255	276	301	329	363	408	462	528	612	727	872	1051	1256	1486	1723	1922	2122	2125	2279
ZS	179	210	200	213	208	210	198	191	186	185	189	197	205	217	237	265	303	355	419	502	600	703	800	853	899	945
